# Supplementary material for: Absence labels: How does information about production practices impact consumer demand?
Source: PLoS One. 2019 Jun 26;14(6):e0217934. doi: 10.1371/journal.pone.0217934 (PMC6594594; doi:10.1371/journal.pone.0217934)
Supplement: S1 Dataset — (CSV) [file pone.0217934.s001.csv]

wine_type	response_id	age	female	race	income	education	children	read_label	healthy_stores	organic_purchase	drink_wine	buy_wine	sulfites	treatment	bid	intolerence_sulfites	organicgrape	organic	red	treat1	treat2	treat3	bid_verylow	bid_normal
3	R_31aQAnwLQd1nUAc	46	1	1	3	3	1	1	1	2	7	6	10	1	10	1	1	0	0	1	0	0	0	1
1	R_31aQAnwLQd1nUAc	46	1	1	3	3	1	1	1	2	7	6	10	1	10	1	0	0	0	1	0	0	0	1
4	R_31aQAnwLQd1nUAc	46	1	1	3	3	1	1	1	2	7	6	10	1	7	1	0	0	1	1	0	0	0	1
5	R_31aQAnwLQd1nUAc	46	1	1	3	3	1	1	1	2	7	6	10	1	12	1	0	1	1	1	0	0	0	1
6	R_31aQAnwLQd1nUAc	46	1	1	3	3	1	1	1	2	7	6	10	1	12	1	1	0	1	1	0	0	0	1
2	R_31aQAnwLQd1nUAc	46	1	1	3	3	1	1	1	2	7	6	10	1	8	1	0	1	0	1	0	0	0	1
2	R_1Ed0PWCORlUV2Jy	38	1	1	4	4	1	1	2	3	5	4	8	1	8	1	0	1	0	1	0	0	0	1
5	R_1Ed0PWCORlUV2Jy	38	1	1	4	4	1	1	2	3	5	4	8	1	16	1	0	1	1	1	0	0	0	1
3	R_1Ed0PWCORlUV2Jy	38	1	1	4	4	1	1	2	3	5	4	8	1	12	1	1	0	0	1	0	0	0	1
6	R_1Ed0PWCORlUV2Jy	38	1	1	4	4	1	1	2	3	5	4	8	1	17	1	1	0	1	1	0	0	0	1
1	R_1Ed0PWCORlUV2Jy	38	1	1	4	4	1	1	2	3	5	4	8	1	16	1	0	0	0	1	0	0	0	1
4	R_1Ed0PWCORlUV2Jy	38	1	1	4	4	1	1	2	3	5	4	8	1	14	1	0	0	1	1	0	0	0	1
4	R_1fkYDvVqEUmJIUn	32	1	3	1	6	0	1	4	3	5	4	5	1	26	0	0	0	1	1	0	0	0	1
3	R_1fkYDvVqEUmJIUn	32	1	3	1	6	0	1	4	3	5	4	5	1	22	0	1	0	0	1	0	0	0	1
5	R_1fkYDvVqEUmJIUn	32	1	3	1	6	0	1	4	3	5	4	5	1	23	0	0	1	1	1	0	0	0	1
1	R_1fkYDvVqEUmJIUn	32	1	3	1	6	0	1	4	3	5	4	5	1	20	0	0	0	0	1	0	0	0	1
2	R_1fkYDvVqEUmJIUn	32	1	3	1	6	0	1	4	3	5	4	5	1	25	0	0	1	0	1	0	0	0	1
6	R_1fkYDvVqEUmJIUn	32	1	3	1	6	0	1	4	3	5	4	5	1	22	0	1	0	1	1	0	0	0	1
5	R_2AQIR0GG9lIPEhR	29	1	1	1	4	0	1	3	3	3	2	4	1	23	0	0	1	1	1	0	0	0	1
1	R_2AQIR0GG9lIPEhR	29	1	1	1	4	0	1	3	3	3	2	4	1	17	0	0	0	0	1	0	0	0	1
2	R_2AQIR0GG9lIPEhR	29	1	1	1	4	0	1	3	3	3	2	4	1	16	0	0	1	0	1	0	0	0	1
3	R_2AQIR0GG9lIPEhR	29	1	1	1	4	0	1	3	3	3	2	4	1	22	0	1	0	0	1	0	0	0	1
6	R_2AQIR0GG9lIPEhR	29	1	1	1	4	0	1	3	3	3	2	4	1	24	0	1	0	1	1	0	0	0	1
4	R_2AQIR0GG9lIPEhR	29	1	1	1	4	0	1	3	3	3	2	4	1	18	0	0	0	1	1	0	0	0	1
4	R_1gd4vYv5O51jZXw	39	1	1	4	4	1	1	2	2	3	2	3	1	3	0	0	0	1	1	0	0	1	0
6	R_1gd4vYv5O51jZXw	39	1	1	4	4	1	1	2	2	3	2	3	1	3	0	1	0	1	1	0	0	1	0
2	R_1gd4vYv5O51jZXw	39	1	1	4	4	1	1	2	2	3	2	3	1	6	0	0	1	0	1	0	0	0	1
3	R_1gd4vYv5O51jZXw	39	1	1	4	4	1	1	2	2	3	2	3	1	5	0	1	0	0	1	0	0	1	0
5	R_1gd4vYv5O51jZXw	39	1	1	4	4	1	1	2	2	3	2	3	1	3	0	0	1	1	1	0	0	1	0
1	R_1gd4vYv5O51jZXw	39	1	1	4	4	1	1	2	2	3	2	3	1	5	0	0	0	0	1	0	0	1	0
5	R_3EmROg34e5Zg5sX	43	1	1	3	2	0	1	2	3	4	3	9	1	13	0	0	1	1	1	0	0	0	1
1	R_3EmROg34e5Zg5sX	43	1	1	3	2	0	1	2	3	4	3	9	1	10.99	0	0	0	0	1	0	0	0	1
2	R_3EmROg34e5Zg5sX	43	1	1	3	2	0	1	2	3	4	3	9	1	12.99	0	0	1	0	1	0	0	0	1
4	R_3EmROg34e5Zg5sX	43	1	1	3	2	0	1	2	3	4	3	9	1	11	0	0	0	1	1	0	0	0	1
3	R_3EmROg34e5Zg5sX	43	1	1	3	2	0	1	2	3	4	3	9	1	9.9899998	0	1	0	0	1	0	0	0	1
6	R_3EmROg34e5Zg5sX	43	1	1	3	2	0	1	2	3	4	3	9	1	13	0	1	0	1	1	0	0	0	1
4	R_3nDzmaxOVY34jKo	46	1	1	3	3	1	1	3	3	7	4	7	1	11	0	0	0	1	1	0	0	0	1
1	R_3nDzmaxOVY34jKo	46	1	1	3	3	1	1	3	3	7	4	7	1	10	0	0	0	0	1	0	0	0	1
3	R_3nDzmaxOVY34jKo	46	1	1	3	3	1	1	3	3	7	4	7	1	14	0	1	0	0	1	0	0	0	1
5	R_3nDzmaxOVY34jKo	46	1	1	3	3	1	1	3	3	7	4	7	1	15	0	0	1	1	1	0	0	0	1
6	R_3nDzmaxOVY34jKo	46	1	1	3	3	1	1	3	3	7	4	7	1	15	0	1	0	1	1	0	0	0	1
2	R_3nDzmaxOVY34jKo	46	1	1	3	3	1	1	3	3	7	4	7	1	14	0	0	1	0	1	0	0	0	1
2	R_3sh9xlVD6g2swDd	27	1	3	2	6	0	1	3	3	4	3	6	1	18.209999	0	0	1	0	1	0	0	0	1
3	R_3sh9xlVD6g2swDd	27	1	3	2	6	0	1	3	3	4	3	6	1	15.31	0	1	0	0	1	0	0	0	1
5	R_3sh9xlVD6g2swDd	27	1	3	2	6	0	1	3	3	4	3	6	1	15.6	0	0	1	1	1	0	0	0	1
4	R_3sh9xlVD6g2swDd	27	1	3	2	6	0	1	3	3	4	3	6	1	19.209999	0	0	0	1	1	0	0	0	1
6	R_3sh9xlVD6g2swDd	27	1	3	2	6	0	1	3	3	4	3	6	1	17.32	0	1	0	1	1	0	0	0	1
1	R_3sh9xlVD6g2swDd	27	1	3	2	6	0	1	3	3	4	3	6	1	17.389999	0	0	0	0	1	0	0	0	1
3	R_3oBmbFIlOQWivKE	21	0	6	1	4	0	1	2	3	5	5	2	1	15.01	0	1	0	0	1	0	0	0	1
5	R_3oBmbFIlOQWivKE	21	0	6	1	4	0	1	2	3	5	5	2	1	14.5	0	0	1	1	1	0	0	0	1
1	R_3oBmbFIlOQWivKE	21	0	6	1	4	0	1	2	3	5	5	2	1	14.02	0	0	0	0	1	0	0	0	1
6	R_3oBmbFIlOQWivKE	21	0	6	1	4	0	1	2	3	5	5	2	1	17.379999	0	1	0	1	1	0	0	0	1
4	R_3oBmbFIlOQWivKE	21	0	6	1	4	0	1	2	3	5	5	2	1	11.11	0	0	0	1	1	0	0	0	1
2	R_3oBmbFIlOQWivKE	21	0	6	1	4	0	1	2	3	5	5	2	1	14.07	0	0	1	0	1	0	0	0	1
5	R_419h9emeggSBho5	53	1	1	2	1	1	1	4	3	5	3	8	1	21	0	0	1	1	1	0	0	0	1
1	R_419h9emeggSBho5	53	1	1	2	1	1	1	4	3	5	3	8	1	16	0	0	0	0	1	0	0	0	1
6	R_419h9emeggSBho5	53	1	1	2	1	1	1	4	3	5	3	8	1	21	0	1	0	1	1	0	0	0	1
2	R_419h9emeggSBho5	53	1	1	2	1	1	1	4	3	5	3	8	1	18	0	0	1	0	1	0	0	0	1
4	R_419h9emeggSBho5	53	1	1	2	1	1	1	4	3	5	3	8	1	15	0	0	0	1	1	0	0	0	1
3	R_419h9emeggSBho5	53	1	1	2	1	1	1	4	3	5	3	8	1	17	0	1	0	0	1	0	0	0	1
2	R_3GrDHvKjT4HfJRo	62	1	1	2	4	0	1	2	3	2	2	4	1	14	0	0	1	0	1	0	0	0	1
1	R_3GrDHvKjT4HfJRo	62	1	1	2	4	0	1	2	3	2	2	4	1	14	0	0	0	0	1	0	0	0	1
6	R_3GrDHvKjT4HfJRo	62	1	1	2	4	0	1	2	3	2	2	4	1	15	0	1	0	1	1	0	0	0	1
3	R_3GrDHvKjT4HfJRo	62	1	1	2	4	0	1	2	3	2	2	4	1	14	0	1	0	0	1	0	0	0	1
4	R_3GrDHvKjT4HfJRo	62	1	1	2	4	0	1	2	3	2	2	4	1	15	0	0	0	1	1	0	0	0	1
5	R_3GrDHvKjT4HfJRo	62	1	1	2	4	0	1	2	3	2	2	4	1	15	0	0	1	1	1	0	0	0	1
2	R_32Yl1qNxmAcLhwV	44	1	1	5	5	1	1	3	3	7	6	3	1	3	0	0	1	0	1	0	0	1	0
3	R_32Yl1qNxmAcLhwV	44	1	1	5	5	1	1	3	3	7	6	3	1	5	0	1	0	0	1	0	0	1	0
1	R_32Yl1qNxmAcLhwV	44	1	1	5	5	1	1	3	3	7	6	3	1	5	0	0	0	0	1	0	0	1	0
5	R_32Yl1qNxmAcLhwV	44	1	1	5	5	1	1	3	3	7	6	3	1	5	0	0	1	1	1	0	0	1	0
4	R_32Yl1qNxmAcLhwV	44	1	1	5	5	1	1	3	3	7	6	3	1	5	0	0	0	1	1	0	0	1	0
6	R_32Yl1qNxmAcLhwV	44	1	1	5	5	1	1	3	3	7	6	3	1	5	0	1	0	1	1	0	0	1	0
5	R_BAmdwR6WdUl7SJX	35	0	3	2	6	1	1	3	3	5	5	5	1	13	0	0	1	1	1	0	0	0	1
3	R_BAmdwR6WdUl7SJX	35	0	3	2	6	1	1	3	3	5	5	5	1	13	0	1	0	0	1	0	0	0	1
6	R_BAmdwR6WdUl7SJX	35	0	3	2	6	1	1	3	3	5	5	5	1	5	0	1	0	1	1	0	0	1	0
4	R_BAmdwR6WdUl7SJX	35	0	3	2	6	1	1	3	3	5	5	5	1	20	0	0	0	1	1	0	0	0	1
2	R_BAmdwR6WdUl7SJX	35	0	3	2	6	1	1	3	3	5	5	5	1	12	0	0	1	0	1	0	0	0	1
1	R_BAmdwR6WdUl7SJX	35	0	3	2	6	1	1	3	3	5	5	5	1	15	0	0	0	0	1	0	0	0	1
5	R_3EyvdklWjuq7CBv	21	0	1	2	2	0	1	3	3	5	2	1	1	20	0	0	1	1	1	0	0	0	1
6	R_3EyvdklWjuq7CBv	21	0	1	2	2	0	1	3	3	5	2	1	1	25	0	1	0	1	1	0	0	0	1
3	R_3EyvdklWjuq7CBv	21	0	1	2	2	0	1	3	3	5	2	1	1	18	0	1	0	0	1	0	0	0	1
4	R_3EyvdklWjuq7CBv	21	0	1	2	2	0	1	3	3	5	2	1	1	13	0	0	0	1	1	0	0	0	1
1	R_3EyvdklWjuq7CBv	21	0	1	2	2	0	1	3	3	5	2	1	1	3	0	0	0	0	1	0	0	1	0
2	R_3EyvdklWjuq7CBv	21	0	1	2	2	0	1	3	3	5	2	1	1	15	0	0	1	0	1	0	0	0	1
4	R_2RWDGKYFytFQyaI	31	0	3	2	4	0	1	2	2	3	2	7	1	7	0	0	0	1	1	0	0	0	1
6	R_2RWDGKYFytFQyaI	31	0	3	2	4	0	1	2	2	3	2	7	1	10	0	1	0	1	1	0	0	0	1
1	R_2RWDGKYFytFQyaI	31	0	3	2	4	0	1	2	2	3	2	7	1	10	0	0	0	0	1	0	0	0	1
3	R_2RWDGKYFytFQyaI	31	0	3	2	4	0	1	2	2	3	2	7	1	7	0	1	0	0	1	0	0	0	1
2	R_2RWDGKYFytFQyaI	31	0	3	2	4	0	1	2	2	3	2	7	1	5	0	0	1	0	1	0	0	1	0
5	R_2RWDGKYFytFQyaI	31	0	3	2	4	0	1	2	2	3	2	7	1	7	0	0	1	1	1	0	0	0	1
2	R_3nAwQ2iERkUZpN8	29	0	1	1	5	0	1	2	2	3	3	4	1	12	0	0	1	0	1	0	0	0	1
3	R_3nAwQ2iERkUZpN8	29	0	1	1	5	0	1	2	2	3	3	4	1	10	0	1	0	0	1	0	0	0	1
5	R_3nAwQ2iERkUZpN8	29	0	1	1	5	0	1	2	2	3	3	4	1	15	0	0	1	1	1	0	0	0	1
4	R_3nAwQ2iERkUZpN8	29	0	1	1	5	0	1	2	2	3	3	4	1	12	0	0	0	1	1	0	0	0	1
1	R_3nAwQ2iERkUZpN8	29	0	1	1	5	0	1	2	2	3	3	4	1	12	0	0	0	0	1	0	0	0	1
6	R_3nAwQ2iERkUZpN8	29	0	1	1	5	0	1	2	2	3	3	4	1	12	0	1	0	1	1	0	0	0	1
3	R_8G5s1F0BDbSvNhD	38	1	3	5	6	0	1	3	3	6	2	2	1	18	0	1	0	0	1	0	0	0	1
5	R_8G5s1F0BDbSvNhD	38	1	3	5	6	0	1	3	3	6	2	2	1	18	0	0	1	1	1	0	0	0	1
4	R_8G5s1F0BDbSvNhD	38	1	3	5	6	0	1	3	3	6	2	2	1	15	0	0	0	1	1	0	0	0	1
2	R_8G5s1F0BDbSvNhD	38	1	3	5	6	0	1	3	3	6	2	2	1	15	0	0	1	0	1	0	0	0	1
1	R_8G5s1F0BDbSvNhD	38	1	3	5	6	0	1	3	3	6	2	2	1	12	0	0	0	0	1	0	0	0	1
6	R_8G5s1F0BDbSvNhD	38	1	3	5	6	0	1	3	3	6	2	2	1	18	0	1	0	1	1	0	0	0	1
3	R_1GJpJQtVNWjdW2U	35	1	3	2	6	0	1	3	3	4	4	5	1	7.5	1	1	0	0	1	0	0	0	1
1	R_1GJpJQtVNWjdW2U	35	1	3	2	6	0	1	3	3	4	4	5	1	10.99	1	0	0	0	1	0	0	0	1
5	R_1GJpJQtVNWjdW2U	35	1	3	2	6	0	1	3	3	4	4	5	1	10	1	0	1	1	1	0	0	0	1
6	R_1GJpJQtVNWjdW2U	35	1	3	2	6	0	1	3	3	4	4	5	1	0	1	1	0	1	1	0	0	1	0
2	R_1GJpJQtVNWjdW2U	35	1	3	2	6	0	1	3	3	4	4	5	1	8	1	0	1	0	1	0	0	0	1
4	R_1GJpJQtVNWjdW2U	35	1	3	2	6	0	1	3	3	4	4	5	1	8.9899998	1	0	0	1	1	0	0	0	1
4	R_1ri8Igsw4jGXY2V	50	1	1	2	4	0	1	3	3	6	5	4	1	11	0	0	0	1	1	0	0	0	1
3	R_1ri8Igsw4jGXY2V	50	1	1	2	4	0	1	3	3	6	5	4	1	24	0	1	0	0	1	0	0	0	1
6	R_1ri8Igsw4jGXY2V	50	1	1	2	4	0	1	3	3	6	5	4	1	22	0	1	0	1	1	0	0	0	1
1	R_1ri8Igsw4jGXY2V	50	1	1	2	4	0	1	3	3	6	5	4	1	18	0	0	0	0	1	0	0	0	1
2	R_1ri8Igsw4jGXY2V	50	1	1	2	4	0	1	3	3	6	5	4	1	21	0	0	1	0	1	0	0	0	1
5	R_1ri8Igsw4jGXY2V	50	1	1	2	4	0	1	3	3	6	5	4	1	23	0	0	1	1	1	0	0	0	1
4	R_1itbGKefn7lLF6o	51	1	1	4	3	1	1	2	2	4	3	1	1	8	0	0	0	1	1	0	0	0	1
5	R_1itbGKefn7lLF6o	51	1	1	4	3	1	1	2	2	4	3	1	1	6	0	0	1	1	1	0	0	0	1
6	R_1itbGKefn7lLF6o	51	1	1	4	3	1	1	2	2	4	3	1	1	8	0	1	0	1	1	0	0	0	1
1	R_1itbGKefn7lLF6o	51	1	1	4	3	1	1	2	2	4	3	1	1	6	0	0	0	0	1	0	0	0	1
2	R_1itbGKefn7lLF6o	51	1	1	4	3	1	1	2	2	4	3	1	1	7	0	0	1	0	1	0	0	0	1
3	R_1itbGKefn7lLF6o	51	1	1	4	3	1	1	2	2	4	3	1	1	7	0	1	0	0	1	0	0	0	1
1	R_1oIso483LvLhNTD	63	1	1	2	4	0	1	1	3	2	2	1	1	15	0	0	0	0	1	0	0	0	1
6	R_1oIso483LvLhNTD	63	1	1	2	4	0	1	1	3	2	2	1	1	18	0	1	0	1	1	0	0	0	1
5	R_1oIso483LvLhNTD	63	1	1	2	4	0	1	1	3	2	2	1	1	16	0	0	1	1	1	0	0	0	1
2	R_1oIso483LvLhNTD	63	1	1	2	4	0	1	1	3	2	2	1	1	13	0	0	1	0	1	0	0	0	1
3	R_1oIso483LvLhNTD	63	1	1	2	4	0	1	1	3	2	2	1	1	16	0	1	0	0	1	0	0	0	1
4	R_1oIso483LvLhNTD	63	1	1	2	4	0	1	1	3	2	2	1	1	14	0	0	0	1	1	0	0	0	1
3	R_3PYxIdWsWMZKYjU	22	1	3	4	4	0	0	2	2	6	2	1	1	17	0	1	0	0	1	0	0	0	1
2	R_3PYxIdWsWMZKYjU	22	1	3	4	4	0	0	2	2	6	2	1	1	15	0	0	1	0	1	0	0	0	1
5	R_3PYxIdWsWMZKYjU	22	1	3	4	4	0	0	2	2	6	2	1	1	13	0	0	1	1	1	0	0	0	1
6	R_3PYxIdWsWMZKYjU	22	1	3	4	4	0	0	2	2	6	2	1	1	12	0	1	0	1	1	0	0	0	1
4	R_3PYxIdWsWMZKYjU	22	1	3	4	4	0	0	2	2	6	2	1	1	2	0	0	0	1	1	0	0	1	0
1	R_3PYxIdWsWMZKYjU	22	1	3	4	4	0	0	2	2	6	2	1	1	15	0	0	0	0	1	0	0	0	1
2	R_xbgCB09rYQB1f3j	48	1	1	2	2	1	1	2	3	4	2	1	1	13	0	0	1	0	1	0	0	0	1
1	R_xbgCB09rYQB1f3j	48	1	1	2	2	1	1	2	3	4	2	1	1	12	0	0	0	0	1	0	0	0	1
6	R_xbgCB09rYQB1f3j	48	1	1	2	2	1	1	2	3	4	2	1	1	14	0	1	0	1	1	0	0	0	1
5	R_xbgCB09rYQB1f3j	48	1	1	2	2	1	1	2	3	4	2	1	1	12	0	0	1	1	1	0	0	0	1
3	R_xbgCB09rYQB1f3j	48	1	1	2	2	1	1	2	3	4	2	1	1	15	0	1	0	0	1	0	0	0	1
4	R_xbgCB09rYQB1f3j	48	1	1	2	2	1	1	2	3	4	2	1	1	15	0	0	0	1	1	0	0	0	1
1	R_ZwMCNEbVf7DfdMB	54	1	1	2	4	1	1	2	3	7	4	9	1	10	0	0	0	0	1	0	0	0	1
5	R_ZwMCNEbVf7DfdMB	54	1	1	2	4	1	1	2	3	7	4	9	1	12	0	0	1	1	1	0	0	0	1
4	R_ZwMCNEbVf7DfdMB	54	1	1	2	4	1	1	2	3	7	4	9	1	13	0	0	0	1	1	0	0	0	1
6	R_ZwMCNEbVf7DfdMB	54	1	1	2	4	1	1	2	3	7	4	9	1	10	0	1	0	1	1	0	0	0	1
2	R_ZwMCNEbVf7DfdMB	54	1	1	2	4	1	1	2	3	7	4	9	1	12	0	0	1	0	1	0	0	0	1
3	R_ZwMCNEbVf7DfdMB	54	1	1	2	4	1	1	2	3	7	4	9	1	10	0	1	0	0	1	0	0	0	1
5	R_esS5O43jgQWZWzT	49	1	1	2	4	1	1	2	2	4	4	10	1	10	1	0	1	1	1	0	0	0	1
6	R_esS5O43jgQWZWzT	49	1	1	2	4	1	1	2	2	4	4	10	1	10	1	1	0	1	1	0	0	0	1
3	R_esS5O43jgQWZWzT	49	1	1	2	4	1	1	2	2	4	4	10	1	6	1	1	0	0	1	0	0	0	1
1	R_esS5O43jgQWZWzT	49	1	1	2	4	1	1	2	2	4	4	10	1	8	1	0	0	0	1	0	0	0	1
4	R_esS5O43jgQWZWzT	49	1	1	2	4	1	1	2	2	4	4	10	1	9	1	0	0	1	1	0	0	0	1
2	R_esS5O43jgQWZWzT	49	1	1	2	4	1	1	2	2	4	4	10	1	6	1	0	1	0	1	0	0	0	1
4	R_21mqNgSvp9kYcSs	49	1	1	2	3	0	0	2	3	3	3	10	1	0	1	0	0	1	1	0	0	1	0
6	R_21mqNgSvp9kYcSs	49	1	1	2	3	0	0	2	3	3	3	10	1	0	1	1	0	1	1	0	0	1	0
5	R_21mqNgSvp9kYcSs	49	1	1	2	3	0	0	2	3	3	3	10	1	0	1	0	1	1	1	0	0	1	0
3	R_21mqNgSvp9kYcSs	49	1	1	2	3	0	0	2	3	3	3	10	1	6.9899998	1	1	0	0	1	0	0	0	1
1	R_21mqNgSvp9kYcSs	49	1	1	2	3	0	0	2	3	3	3	10	1	6.9899998	1	0	0	0	1	0	0	0	1
2	R_21mqNgSvp9kYcSs	49	1	1	2	3	0	0	2	3	3	3	10	1	6.9899998	1	0	1	0	1	0	0	0	1
2	R_3PjCWN1UWBTOOkx	36	1	1	2	3	0	1	2	2	5	3	4	1	9	0	0	1	0	1	0	0	0	1
1	R_3PjCWN1UWBTOOkx	36	1	1	2	3	0	1	2	2	5	3	4	1	11	0	0	0	0	1	0	0	0	1
4	R_3PjCWN1UWBTOOkx	36	1	1	2	3	0	1	2	2	5	3	4	1	10	0	0	0	1	1	0	0	0	1
6	R_3PjCWN1UWBTOOkx	36	1	1	2	3	0	1	2	2	5	3	4	1	7	0	1	0	1	1	0	0	0	1
5	R_3PjCWN1UWBTOOkx	36	1	1	2	3	0	1	2	2	5	3	4	1	7	0	0	1	1	1	0	0	0	1
3	R_3PjCWN1UWBTOOkx	36	1	1	2	3	0	1	2	2	5	3	4	1	11	0	1	0	0	1	0	0	0	1
1	R_Zk3Nj0hDpmI9ZAJ	27	1	3	2	5	0	1	3	2	3	3	6	1	12	0	0	0	0	1	0	0	0	1
4	R_Zk3Nj0hDpmI9ZAJ	27	1	3	2	5	0	1	3	2	3	3	6	1	10	0	0	0	1	1	0	0	0	1
5	R_Zk3Nj0hDpmI9ZAJ	27	1	3	2	5	0	1	3	2	3	3	6	1	13	0	0	1	1	1	0	0	0	1
6	R_Zk3Nj0hDpmI9ZAJ	27	1	3	2	5	0	1	3	2	3	3	6	1	13	0	1	0	1	1	0	0	0	1
3	R_Zk3Nj0hDpmI9ZAJ	27	1	3	2	5	0	1	3	2	3	3	6	1	10	0	1	0	0	1	0	0	0	1
2	R_Zk3Nj0hDpmI9ZAJ	27	1	3	2	5	0	1	3	2	3	3	6	1	15	0	0	1	0	1	0	0	0	1
4	R_1q4A0pau0tMVgvL	37	0	6	1	4	0	0	3	3	4	2	1	1	15	0	0	0	1	1	0	0	0	1
1	R_1q4A0pau0tMVgvL	37	0	6	1	4	0	0	3	3	4	2	1	1	18	0	0	0	0	1	0	0	0	1
3	R_1q4A0pau0tMVgvL	37	0	6	1	4	0	0	3	3	4	2	1	1	22	0	1	0	0	1	0	0	0	1
6	R_1q4A0pau0tMVgvL	37	0	6	1	4	0	0	3	3	4	2	1	1	18	0	1	0	1	1	0	0	0	1
2	R_1q4A0pau0tMVgvL	37	0	6	1	4	0	0	3	3	4	2	1	1	17	0	0	1	0	1	0	0	0	1
5	R_1q4A0pau0tMVgvL	37	0	6	1	4	0	0	3	3	4	2	1	1	18	0	0	1	1	1	0	0	0	1
1	R_PSZD07nxjgRXNEB	21	0	2	5	2	0	1	2	2	2	2	1	1	17	0	0	0	0	1	0	0	0	1
6	R_PSZD07nxjgRXNEB	21	0	2	5	2	0	1	2	2	2	2	1	1	26	0	1	0	1	1	0	0	0	1
4	R_PSZD07nxjgRXNEB	21	0	2	5	2	0	1	2	2	2	2	1	1	20.01	0	0	0	1	1	0	0	0	1
2	R_PSZD07nxjgRXNEB	21	0	2	5	2	0	1	2	2	2	2	1	1	13	0	0	1	0	1	0	0	0	1
3	R_PSZD07nxjgRXNEB	21	0	2	5	2	0	1	2	2	2	2	1	1	14	0	1	0	0	1	0	0	0	1
5	R_PSZD07nxjgRXNEB	21	0	2	5	2	0	1	2	2	2	2	1	1	23.99	0	0	1	1	1	0	0	0	1
5	R_2YhzPGzSbKMMoCa	21	0	2	1	2	0	1	2	2	6	2	6	1	16.23	0	0	1	1	1	0	0	0	1
1	R_2YhzPGzSbKMMoCa	21	0	2	1	2	0	1	2	2	6	2	6	1	18	0	0	0	0	1	0	0	0	1
4	R_2YhzPGzSbKMMoCa	21	0	2	1	2	0	1	2	2	6	2	6	1	11	0	0	0	1	1	0	0	0	1
3	R_2YhzPGzSbKMMoCa	21	0	2	1	2	0	1	2	2	6	2	6	1	14.01	0	1	0	0	1	0	0	0	1
2	R_2YhzPGzSbKMMoCa	21	0	2	1	2	0	1	2	2	6	2	6	1	13	0	0	1	0	1	0	0	0	1
6	R_2YhzPGzSbKMMoCa	21	0	2	1	2	0	1	2	2	6	2	6	1	15	0	1	0	1	1	0	0	0	1
5	R_1qWWYtUcAmd9yd3	32	0	1	4	4	1	1	3	4	5	4	2	1	14	0	0	1	1	1	0	0	0	1
1	R_1qWWYtUcAmd9yd3	32	0	1	4	4	1	1	3	4	5	4	2	1	8	0	0	0	0	1	0	0	0	1
4	R_1qWWYtUcAmd9yd3	32	0	1	4	4	1	1	3	4	5	4	2	1	10	0	0	0	1	1	0	0	0	1
3	R_1qWWYtUcAmd9yd3	32	0	1	4	4	1	1	3	4	5	4	2	1	8	0	1	0	0	1	0	0	0	1
2	R_1qWWYtUcAmd9yd3	32	0	1	4	4	1	1	3	4	5	4	2	1	10	0	0	1	0	1	0	0	0	1
6	R_1qWWYtUcAmd9yd3	32	0	1	4	4	1	1	3	4	5	4	2	1	12	0	1	0	1	1	0	0	0	1
6	R_26liRyonzSczQ6t	22	0	1	2	3	0	1	1	1	4	3	1	1	25	0	1	0	1	1	0	0	0	1
3	R_26liRyonzSczQ6t	22	0	1	2	3	0	1	1	1	4	3	1	1	26	0	1	0	0	1	0	0	0	1
4	R_26liRyonzSczQ6t	22	0	1	2	3	0	1	1	1	4	3	1	1	17.299999	0	0	0	1	1	0	0	0	1
5	R_26liRyonzSczQ6t	22	0	1	2	3	0	1	1	1	4	3	1	1	21.5	0	0	1	1	1	0	0	0	1
1	R_26liRyonzSczQ6t	22	0	1	2	3	0	1	1	1	4	3	1	1	18	0	0	0	0	1	0	0	0	1
2	R_26liRyonzSczQ6t	22	0	1	2	3	0	1	1	1	4	3	1	1	16	0	0	1	0	1	0	0	0	1
2	R_3psCpIGIAjpcI3d	21	1	1	2	2	0	1	2	1	3	3	2	1	15	0	0	1	0	1	0	0	0	1
3	R_3psCpIGIAjpcI3d	21	1	1	2	2	0	1	2	1	3	3	2	1	19	0	1	0	0	1	0	0	0	1
4	R_3psCpIGIAjpcI3d	21	1	1	2	2	0	1	2	1	3	3	2	1	14	0	0	0	1	1	0	0	0	1
5	R_3psCpIGIAjpcI3d	21	1	1	2	2	0	1	2	1	3	3	2	1	22	0	0	1	1	1	0	0	0	1
1	R_3psCpIGIAjpcI3d	21	1	1	2	2	0	1	2	1	3	3	2	1	16.5	0	0	0	0	1	0	0	0	1
6	R_3psCpIGIAjpcI3d	21	1	1	2	2	0	1	2	1	3	3	2	1	25	0	1	0	1	1	0	0	0	1
6	R_1QyC8TDHEjiScJS	33	0	3	1	5	0	1	1	3	4	3	4	1	15	0	1	0	1	1	0	0	0	1
4	R_1QyC8TDHEjiScJS	33	0	3	1	5	0	1	1	3	4	3	4	1	8	0	0	0	1	1	0	0	0	1
1	R_1QyC8TDHEjiScJS	33	0	3	1	5	0	1	1	3	4	3	4	1	8	0	0	0	0	1	0	0	0	1
5	R_1QyC8TDHEjiScJS	33	0	3	1	5	0	1	1	3	4	3	4	1	12	0	0	1	1	1	0	0	0	1
3	R_1QyC8TDHEjiScJS	33	0	3	1	5	0	1	1	3	4	3	4	1	15	0	1	0	0	1	0	0	0	1
2	R_1QyC8TDHEjiScJS	33	0	3	1	5	0	1	1	3	4	3	4	1	8	0	0	1	0	1	0	0	0	1
6	R_SVRafEQNpEMaIBX	44	1	6	2	4	0	1	3	2	3	3	7	1	12	0	1	0	1	1	0	0	0	1
2	R_SVRafEQNpEMaIBX	44	1	6	2	4	0	1	3	2	3	3	7	1	8	0	0	1	0	1	0	0	0	1
4	R_SVRafEQNpEMaIBX	44	1	6	2	4	0	1	3	2	3	3	7	1	8	0	0	0	1	1	0	0	0	1
1	R_SVRafEQNpEMaIBX	44	1	6	2	4	0	1	3	2	3	3	7	1	7.25	0	0	0	0	1	0	0	0	1
3	R_SVRafEQNpEMaIBX	44	1	6	2	4	0	1	3	2	3	3	7	1	9	0	1	0	0	1	0	0	0	1
5	R_SVRafEQNpEMaIBX	44	1	6	2	4	0	1	3	2	3	3	7	1	11	0	0	1	1	1	0	0	0	1
3	R_1d0lCHcuMkg8skG	22	1	3	5	4	0	1	4	4	2	2	3	1	3	0	1	0	0	1	0	0	1	0
4	R_1d0lCHcuMkg8skG	22	1	3	5	4	0	1	4	4	2	2	3	1	10	0	0	0	1	1	0	0	0	1
1	R_1d0lCHcuMkg8skG	22	1	3	5	4	0	1	4	4	2	2	3	1	7	0	0	0	0	1	0	0	0	1
6	R_1d0lCHcuMkg8skG	22	1	3	5	4	0	1	4	4	2	2	3	1	11	0	1	0	1	1	0	0	0	1
2	R_1d0lCHcuMkg8skG	22	1	3	5	4	0	1	4	4	2	2	3	1	1	0	0	1	0	1	0	0	1	0
5	R_1d0lCHcuMkg8skG	22	1	3	5	4	0	1	4	4	2	2	3	1	13	0	0	1	1	1	0	0	0	1
1	R_10xydBuibOTffFN	26	1	3	2	6	0	1	1	2	6	4	6	1	12	0	0	0	0	1	0	0	0	1
2	R_10xydBuibOTffFN	26	1	3	2	6	0	1	1	2	6	4	6	1	12	0	0	1	0	1	0	0	0	1
5	R_10xydBuibOTffFN	26	1	3	2	6	0	1	1	2	6	4	6	1	19	0	0	1	1	1	0	0	0	1
3	R_10xydBuibOTffFN	26	1	3	2	6	0	1	1	2	6	4	6	1	13.5	0	1	0	0	1	0	0	0	1
6	R_10xydBuibOTffFN	26	1	3	2	6	0	1	1	2	6	4	6	1	19	0	1	0	1	1	0	0	0	1
4	R_10xydBuibOTffFN	26	1	3	2	6	0	1	1	2	6	4	6	1	10	0	0	0	1	1	0	0	0	1
5	R_2X5QL4XDjcet9fA	45	0	1	2	4	0	1	2	2	4	4	3	1	8.25	0	0	1	1	1	0	0	0	1
3	R_2X5QL4XDjcet9fA	45	0	1	2	4	0	1	2	2	4	4	3	1	12.5	0	1	0	0	1	0	0	0	1
4	R_2X5QL4XDjcet9fA	45	0	1	2	4	0	1	2	2	4	4	3	1	13.99	0	0	0	1	1	0	0	0	1
2	R_2X5QL4XDjcet9fA	45	0	1	2	4	0	1	2	2	4	4	3	1	19.99	0	0	1	0	1	0	0	0	1
6	R_2X5QL4XDjcet9fA	45	0	1	2	4	0	1	2	2	4	4	3	1	8.25	0	1	0	1	1	0	0	0	1
1	R_2X5QL4XDjcet9fA	45	0	1	2	4	0	1	2	2	4	4	3	1	12.5	0	0	0	0	1	0	0	0	1
6	R_88QHSTGok41Nvwd	21	1	3	3	4	0	1	2	2	4	4	1	1	21	0	1	0	1	1	0	0	0	1
1	R_88QHSTGok41Nvwd	21	1	3	3	4	0	1	2	2	4	4	1	1	14.5	0	0	0	0	1	0	0	0	1
2	R_88QHSTGok41Nvwd	21	1	3	3	4	0	1	2	2	4	4	1	1	18.25	0	0	1	0	1	0	0	0	1
3	R_88QHSTGok41Nvwd	21	1	3	3	4	0	1	2	2	4	4	1	1	18.25	0	1	0	0	1	0	0	0	1
4	R_88QHSTGok41Nvwd	21	1	3	3	4	0	1	2	2	4	4	1	1	16.200001	0	0	0	1	1	0	0	0	1
5	R_88QHSTGok41Nvwd	21	1	3	3	4	0	1	2	2	4	4	1	1	20	0	0	1	1	1	0	0	0	1
4	R_PFDmNfrjFG9EmBP	22	0	1	1	4	0	1	2	2	3	3	2	1	18	0	0	0	1	1	0	0	0	1
1	R_PFDmNfrjFG9EmBP	22	0	1	1	4	0	1	2	2	3	3	2	1	13	0	0	0	0	1	0	0	0	1
6	R_PFDmNfrjFG9EmBP	22	0	1	1	4	0	1	2	2	3	3	2	1	25	0	1	0	1	1	0	0	0	1
5	R_PFDmNfrjFG9EmBP	22	0	1	1	4	0	1	2	2	3	3	2	1	24	0	0	1	1	1	0	0	0	1
2	R_PFDmNfrjFG9EmBP	22	0	1	1	4	0	1	2	2	3	3	2	1	11	0	0	1	0	1	0	0	0	1
3	R_PFDmNfrjFG9EmBP	22	0	1	1	4	0	1	2	2	3	3	2	1	11	0	1	0	0	1	0	0	0	1
5	R_2EbDP1q9KNjtUUX	27	1	1	3	4	0	1	1	1	6	4	1	1	18	0	0	1	1	1	0	0	0	1
4	R_2EbDP1q9KNjtUUX	27	1	1	3	4	0	1	1	1	6	4	1	1	20.99	0	0	0	1	1	0	0	0	1
1	R_2EbDP1q9KNjtUUX	27	1	1	3	4	0	1	1	1	6	4	1	1	15	0	0	0	0	1	0	0	0	1
2	R_2EbDP1q9KNjtUUX	27	1	1	3	4	0	1	1	1	6	4	1	1	13	0	0	1	0	1	0	0	0	1
3	R_2EbDP1q9KNjtUUX	27	1	1	3	4	0	1	1	1	6	4	1	1	14	0	1	0	0	1	0	0	0	1
6	R_2EbDP1q9KNjtUUX	27	1	1	3	4	0	1	1	1	6	4	1	1	18	0	1	0	1	1	0	0	0	1
1	R_yKm8zzart5OyziV	27	1	3	2	4	0	1	2	2	4	4	4	2	7	0	0	0	0	0	1	0	0	1
6	R_yKm8zzart5OyziV	27	1	3	2	4	0	1	2	2	4	4	4	2	6	0	1	0	1	0	1	0	0	1
4	R_yKm8zzart5OyziV	27	1	3	2	4	0	1	2	2	4	4	4	2	5	0	0	0	1	0	1	0	1	0
3	R_yKm8zzart5OyziV	27	1	3	2	4	0	1	2	2	4	4	4	2	6	0	1	0	0	0	1	0	0	1
2	R_yKm8zzart5OyziV	27	1	3	2	4	0	1	2	2	4	4	4	2	7	0	0	1	0	0	1	0	0	1
5	R_yKm8zzart5OyziV	27	1	3	2	4	0	1	2	2	4	4	4	2	5	0	0	1	1	0	1	0	1	0
6	R_25HMcJPI1gYfD2r	38	1	1	2	1	1	0	2	1	3	3	2	2	5	0	1	0	1	0	1	0	1	0
4	R_25HMcJPI1gYfD2r	38	1	1	2	1	1	0	2	1	3	3	2	2	5	0	0	0	1	0	1	0	1	0
1	R_25HMcJPI1gYfD2r	38	1	1	2	1	1	0	2	1	3	3	2	2	7	0	0	0	0	0	1	0	0	1
5	R_25HMcJPI1gYfD2r	38	1	1	2	1	1	0	2	1	3	3	2	2	5	0	0	1	1	0	1	0	1	0
2	R_25HMcJPI1gYfD2r	38	1	1	2	1	1	0	2	1	3	3	2	2	8	0	0	1	0	0	1	0	0	1
3	R_25HMcJPI1gYfD2r	38	1	1	2	1	1	0	2	1	3	3	2	2	8	0	1	0	0	0	1	0	0	1
6	R_3PzcFzRuRLqBMtR	21	1	6	1	2	0	1	2	2	4	4	1	2	16	0	1	0	1	0	1	0	0	1
3	R_3PzcFzRuRLqBMtR	21	1	6	1	2	0	1	2	2	4	4	1	2	15	0	1	0	0	0	1	0	0	1
1	R_3PzcFzRuRLqBMtR	21	1	6	1	2	0	1	2	2	4	4	1	2	15	0	0	0	0	0	1	0	0	1
4	R_3PzcFzRuRLqBMtR	21	1	6	1	2	0	1	2	2	4	4	1	2	13	0	0	0	1	0	1	0	0	1
2	R_3PzcFzRuRLqBMtR	21	1	6	1	2	0	1	2	2	4	4	1	2	17	0	0	1	0	0	1	0	0	1
5	R_3PzcFzRuRLqBMtR	21	1	6	1	2	0	1	2	2	4	4	1	2	17	0	0	1	1	0	1	0	0	1
4	R_eA0ej6MjJDLr3q1	53	1	1	4	5	1	0	2	2	5	3	10	2	0	1	0	0	1	0	1	0	1	0
3	R_eA0ej6MjJDLr3q1	53	1	1	4	5	1	0	2	2	5	3	10	2	12.95	1	1	0	0	0	1	0	0	1
6	R_eA0ej6MjJDLr3q1	53	1	1	4	5	1	0	2	2	5	3	10	2	8	1	1	0	1	0	1	0	0	1
1	R_eA0ej6MjJDLr3q1	53	1	1	4	5	1	0	2	2	5	3	10	2	11.5	1	0	0	0	0	1	0	0	1
2	R_eA0ej6MjJDLr3q1	53	1	1	4	5	1	0	2	2	5	3	10	2	8	1	0	1	0	0	1	0	0	1
5	R_eA0ej6MjJDLr3q1	53	1	1	4	5	1	0	2	2	5	3	10	2	10	1	0	1	1	0	1	0	0	1
4	R_2Vdxi53GN36wfg4	60	1	1	2	4	1	1	2	2	5	4	9	2	4.9899998	0	0	0	1	0	1	0	1	0
5	R_2Vdxi53GN36wfg4	60	1	1	2	4	1	1	2	2	5	4	9	2	8.4899998	0	0	1	1	0	1	0	0	1
2	R_2Vdxi53GN36wfg4	60	1	1	2	4	1	1	2	2	5	4	9	2	7	0	0	1	0	0	1	0	0	1
6	R_2Vdxi53GN36wfg4	60	1	1	2	4	1	1	2	2	5	4	9	2	6.9899998	0	1	0	1	0	1	0	0	1
3	R_2Vdxi53GN36wfg4	60	1	1	2	4	1	1	2	2	5	4	9	2	6.4899998	0	1	0	0	0	1	0	0	1
1	R_2Vdxi53GN36wfg4	60	1	1	2	4	1	1	2	2	5	4	9	2	6.4899998	0	0	0	0	0	1	0	0	1
6	R_1oAY7nBl32JnIsH	25	0	1	2	3	0	1	2	3	5	5	1	2	18	0	1	0	1	0	1	0	0	1
4	R_1oAY7nBl32JnIsH	25	0	1	2	3	0	1	2	3	5	5	1	2	14	0	0	0	1	0	1	0	0	1
2	R_1oAY7nBl32JnIsH	25	0	1	2	3	0	1	2	3	5	5	1	2	13	0	0	1	0	0	1	0	0	1
1	R_1oAY7nBl32JnIsH	25	0	1	2	3	0	1	2	3	5	5	1	2	8	0	0	0	0	0	1	0	0	1
5	R_1oAY7nBl32JnIsH	25	0	1	2	3	0	1	2	3	5	5	1	2	20	0	0	1	1	0	1	0	0	1
3	R_1oAY7nBl32JnIsH	25	0	1	2	3	0	1	2	3	5	5	1	2	15	0	1	0	0	0	1	0	0	1
6	R_8k12JQ8X37v6gAV	59	1	1	2	4	1	1	3	3	4	4	9	2	12	1	1	0	1	0	1	0	0	1
1	R_8k12JQ8X37v6gAV	59	1	1	2	4	1	1	3	3	4	4	9	2	8	1	0	0	0	0	1	0	0	1
2	R_8k12JQ8X37v6gAV	59	1	1	2	4	1	1	3	3	4	4	9	2	12	1	0	1	0	0	1	0	0	1
4	R_8k12JQ8X37v6gAV	59	1	1	2	4	1	1	3	3	4	4	9	2	10	1	0	0	1	0	1	0	0	1
5	R_8k12JQ8X37v6gAV	59	1	1	2	4	1	1	3	3	4	4	9	2	14	1	0	1	1	0	1	0	0	1
3	R_8k12JQ8X37v6gAV	59	1	1	2	4	1	1	3	3	4	4	9	2	10	1	1	0	0	0	1	0	0	1
6	R_3257XN7muIU5GPL	28	0	1	3	4	1	1	3	3	5	4	5	2	10.49	0	1	0	1	0	1	0	0	1
2	R_3257XN7muIU5GPL	28	0	1	3	4	1	1	3	3	5	4	5	2	7.0900002	0	0	1	0	0	1	0	0	1
1	R_3257XN7muIU5GPL	28	0	1	3	4	1	1	3	3	5	4	5	2	4.3699999	0	0	0	0	0	1	0	1	0
3	R_3257XN7muIU5GPL	28	0	1	3	4	1	1	3	3	5	4	5	2	7.9699998	0	1	0	0	0	1	0	0	1
4	R_3257XN7muIU5GPL	28	0	1	3	4	1	1	3	3	5	4	5	2	9.9499998	0	0	0	1	0	1	0	0	1
5	R_3257XN7muIU5GPL	28	0	1	3	4	1	1	3	3	5	4	5	2	11.05	0	0	1	1	0	1	0	0	1
3	R_2VF2DaAxUTBMs7V	47	0	1	4	4	1	1	4	4	6	3	8	2	16	0	1	0	0	0	1	0	0	1
1	R_2VF2DaAxUTBMs7V	47	0	1	4	4	1	1	4	4	6	3	8	2	16.5	0	0	0	0	0	1	0	0	1
4	R_2VF2DaAxUTBMs7V	47	0	1	4	4	1	1	4	4	6	3	8	2	17	0	0	0	1	0	1	0	0	1
2	R_2VF2DaAxUTBMs7V	47	0	1	4	4	1	1	4	4	6	3	8	2	18	0	0	1	0	0	1	0	0	1
6	R_2VF2DaAxUTBMs7V	47	0	1	4	4	1	1	4	4	6	3	8	2	17.5	0	1	0	1	0	1	0	0	1
5	R_2VF2DaAxUTBMs7V	47	0	1	4	4	1	1	4	4	6	3	8	2	19	0	0	1	1	0	1	0	0	1
6	R_31gA1jrKJxBJe8U	21	1	1	5	2	0	1	3	3	5	3	2	2	4.5	0	1	0	1	0	1	0	1	0
4	R_31gA1jrKJxBJe8U	21	1	1	5	2	0	1	3	3	5	3	2	2	3	0	0	0	1	0	1	0	1	0
1	R_31gA1jrKJxBJe8U	21	1	1	5	2	0	1	3	3	5	3	2	2	6	0	0	0	0	0	1	0	0	1
2	R_31gA1jrKJxBJe8U	21	1	1	5	2	0	1	3	3	5	3	2	2	8	0	0	1	0	0	1	0	0	1
5	R_31gA1jrKJxBJe8U	21	1	1	5	2	0	1	3	3	5	3	2	2	4	0	0	1	1	0	1	0	1	0
3	R_31gA1jrKJxBJe8U	21	1	1	5	2	0	1	3	3	5	3	2	2	7.5	0	1	0	0	0	1	0	0	1
5	R_2v6VRRQxuyUY7Ki	46	1	1	2	2	1	1	2	1	4	4	2	2	12	0	0	1	1	0	1	0	0	1
2	R_2v6VRRQxuyUY7Ki	46	1	1	2	2	1	1	2	1	4	4	2	2	9.25	0	0	1	0	0	1	0	0	1
4	R_2v6VRRQxuyUY7Ki	46	1	1	2	2	1	1	2	1	4	4	2	2	9.5	0	0	0	1	0	1	0	0	1
3	R_2v6VRRQxuyUY7Ki	46	1	1	2	2	1	1	2	1	4	4	2	2	11	0	1	0	0	0	1	0	0	1
6	R_2v6VRRQxuyUY7Ki	46	1	1	2	2	1	1	2	1	4	4	2	2	13	0	1	0	1	0	1	0	0	1
1	R_2v6VRRQxuyUY7Ki	46	1	1	2	2	1	1	2	1	4	4	2	2	7	0	0	0	0	0	1	0	0	1
4	R_R2nZ2tE5WLas9ON	21	1	2	3	2	0	1	2	1	4	3	1	2	20	0	0	0	1	0	1	0	0	1
2	R_R2nZ2tE5WLas9ON	21	1	2	3	2	0	1	2	1	4	3	1	2	17	0	0	1	0	0	1	0	0	1
5	R_R2nZ2tE5WLas9ON	21	1	2	3	2	0	1	2	1	4	3	1	2	15	0	0	1	1	0	1	0	0	1
3	R_R2nZ2tE5WLas9ON	21	1	2	3	2	0	1	2	1	4	3	1	2	12	0	1	0	0	0	1	0	0	1
1	R_R2nZ2tE5WLas9ON	21	1	2	3	2	0	1	2	1	4	3	1	2	15	0	0	0	0	0	1	0	0	1
6	R_R2nZ2tE5WLas9ON	21	1	2	3	2	0	1	2	1	4	3	1	2	23	0	1	0	1	0	1	0	0	1
2	R_3G6SYJt5nv0yv7j	30	1	1	2	3	0	1	2	2	6	4	4	2	14	0	0	1	0	0	1	0	0	1
3	R_3G6SYJt5nv0yv7j	30	1	1	2	3	0	1	2	2	6	4	4	2	15	0	1	0	0	0	1	0	0	1
6	R_3G6SYJt5nv0yv7j	30	1	1	2	3	0	1	2	2	6	4	4	2	18	0	1	0	1	0	1	0	0	1
1	R_3G6SYJt5nv0yv7j	30	1	1	2	3	0	1	2	2	6	4	4	2	10	0	0	0	0	0	1	0	0	1
4	R_3G6SYJt5nv0yv7j	30	1	1	2	3	0	1	2	2	6	4	4	2	16	0	0	0	1	0	1	0	0	1
5	R_3G6SYJt5nv0yv7j	30	1	1	2	3	0	1	2	2	6	4	4	2	12	0	0	1	1	0	1	0	0	1
5	R_2X5t3XqibwFjzXR	29	1	1	2	5	0	1	3	3	6	4	7	2	18.5	1	0	1	1	0	1	0	0	1
2	R_2X5t3XqibwFjzXR	29	1	1	2	5	0	1	3	3	6	4	7	2	18	1	0	1	0	0	1	0	0	1
6	R_2X5t3XqibwFjzXR	29	1	1	2	5	0	1	3	3	6	4	7	2	21	1	1	0	1	0	1	0	0	1
4	R_2X5t3XqibwFjzXR	29	1	1	2	5	0	1	3	3	6	4	7	2	20	1	0	0	1	0	1	0	0	1
3	R_2X5t3XqibwFjzXR	29	1	1	2	5	0	1	3	3	6	4	7	2	14	1	1	0	0	0	1	0	0	1
1	R_2X5t3XqibwFjzXR	29	1	1	2	5	0	1	3	3	6	4	7	2	17	1	0	0	0	0	1	0	0	1
4	R_3O9uQSFnTqLwaKs	21	1	2	2	2	0	1	1	2	5	5	1	2	20	0	0	0	1	0	1	0	0	1
5	R_3O9uQSFnTqLwaKs	21	1	2	2	2	0	1	1	2	5	5	1	2	20	0	0	1	1	0	1	0	0	1
3	R_3O9uQSFnTqLwaKs	21	1	2	2	2	0	1	1	2	5	5	1	2	12	0	1	0	0	0	1	0	0	1
2	R_3O9uQSFnTqLwaKs	21	1	2	2	2	0	1	1	2	5	5	1	2	11	0	0	1	0	0	1	0	0	1
6	R_3O9uQSFnTqLwaKs	21	1	2	2	2	0	1	1	2	5	5	1	2	30	0	1	0	1	0	1	0	0	1
1	R_3O9uQSFnTqLwaKs	21	1	2	2	2	0	1	1	2	5	5	1	2	10	0	0	0	0	0	1	0	0	1
1	R_3nuuujRuyxXWd7x	21	1	1	3	4	0	0	3	2	6	5	2	2	7	0	0	0	0	0	1	0	0	1
6	R_3nuuujRuyxXWd7x	21	1	1	3	4	0	0	3	2	6	5	2	2	10	0	1	0	1	0	1	0	0	1
5	R_3nuuujRuyxXWd7x	21	1	1	3	4	0	0	3	2	6	5	2	2	10	0	0	1	1	0	1	0	0	1
2	R_3nuuujRuyxXWd7x	21	1	1	3	4	0	0	3	2	6	5	2	2	6	0	0	1	0	0	1	0	0	1
3	R_3nuuujRuyxXWd7x	21	1	1	3	4	0	0	3	2	6	5	2	2	7	0	1	0	0	0	1	0	0	1
4	R_3nuuujRuyxXWd7x	21	1	1	3	4	0	0	3	2	6	5	2	2	8	0	0	0	1	0	1	0	0	1
3	R_1OW5MRoVAhSYkem	21	0	3	2	4	0	1	1	2	4	2	3	2	6	0	1	0	0	0	1	0	0	1
4	R_1OW5MRoVAhSYkem	21	0	3	2	4	0	1	1	2	4	2	3	2	3.5	0	0	0	1	0	1	0	1	0
6	R_1OW5MRoVAhSYkem	21	0	3	2	4	0	1	1	2	4	2	3	2	6	0	1	0	1	0	1	0	0	1
2	R_1OW5MRoVAhSYkem	21	0	3	2	4	0	1	1	2	4	2	3	2	4	0	0	1	0	0	1	0	1	0
5	R_1OW5MRoVAhSYkem	21	0	3	2	4	0	1	1	2	4	2	3	2	4.9000001	0	0	1	1	0	1	0	1	0
1	R_1OW5MRoVAhSYkem	21	0	3	2	4	0	1	1	2	4	2	3	2	4.5	0	0	0	0	0	1	0	1	0
5	R_2a9pzQKqrYGaj5A	34	1	1	3	4	0	1	4	3	6	4	3	2	12.5	0	0	1	1	0	1	0	0	1
4	R_2a9pzQKqrYGaj5A	34	1	1	3	4	0	1	4	3	6	4	3	2	11	0	0	0	1	0	1	0	0	1
2	R_2a9pzQKqrYGaj5A	34	1	1	3	4	0	1	4	3	6	4	3	2	11.5	0	0	1	0	0	1	0	0	1
3	R_2a9pzQKqrYGaj5A	34	1	1	3	4	0	1	4	3	6	4	3	2	12	0	1	0	0	0	1	0	0	1
6	R_2a9pzQKqrYGaj5A	34	1	1	3	4	0	1	4	3	6	4	3	2	12.75	0	1	0	1	0	1	0	0	1
1	R_2a9pzQKqrYGaj5A	34	1	1	3	4	0	1	4	3	6	4	3	2	12	0	0	0	0	0	1	0	0	1
4	R_1TSMD93nXxG5DO1	46	1	1	2	4	1	1	2	2	4	3	2	2	15	0	0	0	1	0	1	0	0	1
5	R_1TSMD93nXxG5DO1	46	1	1	2	4	1	1	2	2	4	3	2	2	18	0	0	1	1	0	1	0	0	1
6	R_1TSMD93nXxG5DO1	46	1	1	2	4	1	1	2	2	4	3	2	2	17	0	1	0	1	0	1	0	0	1
2	R_1TSMD93nXxG5DO1	46	1	1	2	4	1	1	2	2	4	3	2	2	15	0	0	1	0	0	1	0	0	1
1	R_1TSMD93nXxG5DO1	46	1	1	2	4	1	1	2	2	4	3	2	2	12	0	0	0	0	0	1	0	0	1
3	R_1TSMD93nXxG5DO1	46	1	1	2	4	1	1	2	2	4	3	2	2	12	0	1	0	0	0	1	0	0	1
5	R_3en2DSXiAbic9SX	25	0	3	4	5	0	1	2	1	5	5	6	2	14.99	0	0	1	1	0	1	0	0	1
3	R_3en2DSXiAbic9SX	25	0	3	4	5	0	1	2	1	5	5	6	2	13	0	1	0	0	0	1	0	0	1
4	R_3en2DSXiAbic9SX	25	0	3	4	5	0	1	2	1	5	5	6	2	16	0	0	0	1	0	1	0	0	1
6	R_3en2DSXiAbic9SX	25	0	3	4	5	0	1	2	1	5	5	6	2	17.99	0	1	0	1	0	1	0	0	1
2	R_3en2DSXiAbic9SX	25	0	3	4	5	0	1	2	1	5	5	6	2	9.9899998	0	0	1	0	0	1	0	0	1
1	R_3en2DSXiAbic9SX	25	0	3	4	5	0	1	2	1	5	5	6	2	10.99	0	0	0	0	0	1	0	0	1
6	R_231ym0W5EDDo6X0	28	0	1	3	4	0	0	2	1	3	2	1	2	9.75	0	1	0	1	0	1	0	0	1
4	R_231ym0W5EDDo6X0	28	0	1	3	4	0	0	2	1	3	2	1	2	10	0	0	0	1	0	1	0	0	1
5	R_231ym0W5EDDo6X0	28	0	1	3	4	0	0	2	1	3	2	1	2	9.5	0	0	1	1	0	1	0	0	1
3	R_231ym0W5EDDo6X0	28	0	1	3	4	0	0	2	1	3	2	1	2	11.5	0	1	0	0	0	1	0	0	1
1	R_231ym0W5EDDo6X0	28	0	1	3	4	0	0	2	1	3	2	1	2	11	0	0	0	0	0	1	0	0	1
2	R_231ym0W5EDDo6X0	28	0	1	3	4	0	0	2	1	3	2	1	2	12	0	0	1	0	0	1	0	0	1
1	R_1dzaNkoODf6bW5o	21	1	3	3	2	0	1	2	3	5	2	2	2	10	0	0	0	0	0	1	0	0	1
3	R_1dzaNkoODf6bW5o	21	1	3	3	2	0	1	2	3	5	2	2	2	11	0	1	0	0	0	1	0	0	1
6	R_1dzaNkoODf6bW5o	21	1	3	3	2	0	1	2	3	5	2	2	2	9	0	1	0	1	0	1	0	0	1
4	R_1dzaNkoODf6bW5o	21	1	3	3	2	0	1	2	3	5	2	2	2	8	0	0	0	1	0	1	0	0	1
5	R_1dzaNkoODf6bW5o	21	1	3	3	2	0	1	2	3	5	2	2	2	9	0	0	1	1	0	1	0	0	1
2	R_1dzaNkoODf6bW5o	21	1	3	3	2	0	1	2	3	5	2	2	2	11	0	0	1	0	0	1	0	0	1
6	R_eo1VG62RZZPERa1	38	1	1	2	4	1	1	1	2	4	2	1	2	7.9899998	0	1	0	1	0	1	0	0	1
1	R_eo1VG62RZZPERa1	38	1	1	2	4	1	1	1	2	4	2	1	2	6.9899998	0	0	0	0	0	1	0	0	1
5	R_eo1VG62RZZPERa1	38	1	1	2	4	1	1	1	2	4	2	1	2	6.9899998	0	0	1	1	0	1	0	0	1
2	R_eo1VG62RZZPERa1	38	1	1	2	4	1	1	1	2	4	2	1	2	5.9899998	0	0	1	0	0	1	0	1	0
4	R_eo1VG62RZZPERa1	38	1	1	2	4	1	1	1	2	4	2	1	2	6.5	0	0	0	1	0	1	0	0	1
3	R_eo1VG62RZZPERa1	38	1	1	2	4	1	1	1	2	4	2	1	2	8.5	0	1	0	0	0	1	0	0	1
6	R_3mfPutDx84twpq1	42	1	1	3	5	1	1	2	3	5	3	10	2	15	0	1	0	1	0	1	0	0	1
4	R_3mfPutDx84twpq1	42	1	1	3	5	1	1	2	3	5	3	10	2	9	0	0	0	1	0	1	0	0	1
2	R_3mfPutDx84twpq1	42	1	1	3	5	1	1	2	3	5	3	10	2	12	0	0	1	0	0	1	0	0	1
3	R_3mfPutDx84twpq1	42	1	1	3	5	1	1	2	3	5	3	10	2	11	0	1	0	0	0	1	0	0	1
1	R_3mfPutDx84twpq1	42	1	1	3	5	1	1	2	3	5	3	10	2	8	0	0	0	0	0	1	0	0	1
5	R_3mfPutDx84twpq1	42	1	1	3	5	1	1	2	3	5	3	10	2	12	0	0	1	1	0	1	0	0	1
1	R_1K1MszhC8XMVsCC	40	1	1	2	4	0	1	2	2	5	4	6	2	20	1	0	0	0	0	1	0	0	1
6	R_1K1MszhC8XMVsCC	40	1	1	2	4	0	1	2	2	5	4	6	2	22	1	1	0	1	0	1	0	0	1
3	R_1K1MszhC8XMVsCC	40	1	1	2	4	0	1	2	2	5	4	6	2	19	1	1	0	0	0	1	0	0	1
2	R_1K1MszhC8XMVsCC	40	1	1	2	4	0	1	2	2	5	4	6	2	12	1	0	1	0	0	1	0	0	1
4	R_1K1MszhC8XMVsCC	40	1	1	2	4	0	1	2	2	5	4	6	2	17	1	0	0	1	0	1	0	0	1
5	R_1K1MszhC8XMVsCC	40	1	1	2	4	0	1	2	2	5	4	6	2	22	1	0	1	1	0	1	0	0	1
4	R_2tGB9VpixQkfP18	21	1	1	1	2	0	1	2	2	4	3	2	2	2.99	0	0	0	1	0	1	0	1	0
3	R_2tGB9VpixQkfP18	21	1	1	1	2	0	1	2	2	4	3	2	2	5.9899998	0	1	0	0	0	1	0	1	0
1	R_2tGB9VpixQkfP18	21	1	1	1	2	0	1	2	2	4	3	2	2	5.9899998	0	0	0	0	0	1	0	1	0
6	R_2tGB9VpixQkfP18	21	1	1	1	2	0	1	2	2	4	3	2	2	2.99	0	1	0	1	0	1	0	1	0
2	R_2tGB9VpixQkfP18	21	1	1	1	2	0	1	2	2	4	3	2	2	5.9899998	0	0	1	0	0	1	0	1	0
5	R_2tGB9VpixQkfP18	21	1	1	1	2	0	1	2	2	4	3	2	2	2.99	0	0	1	1	0	1	0	1	0
5	R_3PUc0v8Vij5MezB	32	1	1	2	4	1	1	2	3	4	4	1	2	2	0	0	1	1	0	1	0	1	0
3	R_3PUc0v8Vij5MezB	32	1	1	2	4	1	1	2	3	4	4	1	2	2	0	1	0	0	0	1	0	1	0
2	R_3PUc0v8Vij5MezB	32	1	1	2	4	1	1	2	3	4	4	1	2	2	0	0	1	0	0	1	0	1	0
1	R_3PUc0v8Vij5MezB	32	1	1	2	4	1	1	2	3	4	4	1	2	2	0	0	0	0	0	1	0	1	0
4	R_3PUc0v8Vij5MezB	32	1	1	2	4	1	1	2	3	4	4	1	2	2	0	0	0	1	0	1	0	1	0
6	R_3PUc0v8Vij5MezB	32	1	1	2	4	1	1	2	3	4	4	1	2	2	0	1	0	1	0	1	0	1	0
3	R_T5CZOv2mFQZdQKR	51	1	1	5	4	1	1	3	3	5	3	1	2	6	0	1	0	0	0	1	0	0	1
5	R_T5CZOv2mFQZdQKR	51	1	1	5	4	1	1	3	3	5	3	1	2	5	0	0	1	1	0	1	0	1	0
1	R_T5CZOv2mFQZdQKR	51	1	1	5	4	1	1	3	3	5	3	1	2	5	0	0	0	0	0	1	0	1	0
2	R_T5CZOv2mFQZdQKR	51	1	1	5	4	1	1	3	3	5	3	1	2	6	0	0	1	0	0	1	0	0	1
6	R_T5CZOv2mFQZdQKR	51	1	1	5	4	1	1	3	3	5	3	1	2	5	0	1	0	1	0	1	0	1	0
4	R_T5CZOv2mFQZdQKR	51	1	1	5	4	1	1	3	3	5	3	1	2	4	0	0	0	1	0	1	0	1	0
2	R_1mRGRgn932CnOjs	21	1	1	2	2	0	1	2	2	6	4	3	2	4	0	0	1	0	0	1	0	1	0
3	R_1mRGRgn932CnOjs	21	1	1	2	2	0	1	2	2	6	4	3	2	4.5	0	1	0	0	0	1	0	1	0
5	R_1mRGRgn932CnOjs	21	1	1	2	2	0	1	2	2	6	4	3	2	6.5	0	0	1	1	0	1	0	0	1
6	R_1mRGRgn932CnOjs	21	1	1	2	2	0	1	2	2	6	4	3	2	6	0	1	0	1	0	1	0	0	1
1	R_1mRGRgn932CnOjs	21	1	1	2	2	0	1	2	2	6	4	3	2	5	0	0	0	0	0	1	0	1	0
4	R_1mRGRgn932CnOjs	21	1	1	2	2	0	1	2	2	6	4	3	2	6	0	0	0	1	0	1	0	0	1
4	R_2SdkSjb90oHt2br	30	1	3	2	6	1	1	2	3	5	4	4	2	7.5	0	0	0	1	0	1	0	0	1
2	R_2SdkSjb90oHt2br	30	1	3	2	6	1	1	2	3	5	4	4	2	8.5	0	0	1	0	0	1	0	0	1
1	R_2SdkSjb90oHt2br	30	1	3	2	6	1	1	2	3	5	4	4	2	9	0	0	0	0	0	1	0	0	1
5	R_2SdkSjb90oHt2br	30	1	3	2	6	1	1	2	3	5	4	4	2	9	0	0	1	1	0	1	0	0	1
3	R_2SdkSjb90oHt2br	30	1	3	2	6	1	1	2	3	5	4	4	2	9.5	0	1	0	0	0	1	0	0	1
6	R_2SdkSjb90oHt2br	30	1	3	2	6	1	1	2	3	5	4	4	2	8	0	1	0	1	0	1	0	0	1
1	R_260MCXNDpqE4eOt	50	1	1	3	5	1	0	2	2	2	2	2	2	7	0	0	0	0	0	1	0	0	1
6	R_260MCXNDpqE4eOt	50	1	1	3	5	1	0	2	2	2	2	2	2	5	0	1	0	1	0	1	0	1	0
5	R_260MCXNDpqE4eOt	50	1	1	3	5	1	0	2	2	2	2	2	2	5	0	0	1	1	0	1	0	1	0
3	R_260MCXNDpqE4eOt	50	1	1	3	5	1	0	2	2	2	2	2	2	7	0	1	0	0	0	1	0	0	1
2	R_260MCXNDpqE4eOt	50	1	1	3	5	1	0	2	2	2	2	2	2	9	0	0	1	0	0	1	0	0	1
4	R_260MCXNDpqE4eOt	50	1	1	3	5	1	0	2	2	2	2	2	2	5	0	0	0	1	0	1	0	1	0
6	R_2Ygkfe6iYb3XZpA	47	1	1	2	4	0	0	2	2	3	3	1	2	9	0	1	0	1	0	1	0	0	1
5	R_2Ygkfe6iYb3XZpA	47	1	1	2	4	0	0	2	2	3	3	1	2	7	0	0	1	1	0	1	0	0	1
3	R_2Ygkfe6iYb3XZpA	47	1	1	2	4	0	0	2	2	3	3	1	2	13	0	1	0	0	0	1	0	0	1
4	R_2Ygkfe6iYb3XZpA	47	1	1	2	4	0	0	2	2	3	3	1	2	11	0	0	0	1	0	1	0	0	1
1	R_2Ygkfe6iYb3XZpA	47	1	1	2	4	0	0	2	2	3	3	1	2	13	0	0	0	0	0	1	0	0	1
2	R_2Ygkfe6iYb3XZpA	47	1	1	2	4	0	0	2	2	3	3	1	2	5	0	0	1	0	0	1	0	1	0
4	R_viRu95shSyoFk4h	55	1	1	3	5	1	1	2	2	4	2	7	2	8.7700005	0	0	0	1	0	1	0	0	1
2	R_viRu95shSyoFk4h	55	1	1	3	5	1	1	2	2	4	2	7	2	11	0	0	1	0	0	1	0	0	1
5	R_viRu95shSyoFk4h	55	1	1	3	5	1	1	2	2	4	2	7	2	12.99	0	0	1	1	0	1	0	0	1
6	R_viRu95shSyoFk4h	55	1	1	3	5	1	1	2	2	4	2	7	2	8.9899998	0	1	0	1	0	1	0	0	1
3	R_viRu95shSyoFk4h	55	1	1	3	5	1	1	2	2	4	2	7	2	7.9899998	0	1	0	0	0	1	0	0	1
1	R_viRu95shSyoFk4h	55	1	1	3	5	1	1	2	2	4	2	7	2	6.9899998	0	0	0	0	0	1	0	0	1
3	R_d6keMltuNbX18nn	45	1	1	2	3	1	1	2	2	4	3	3	2	8	0	1	0	0	0	1	0	0	1
1	R_d6keMltuNbX18nn	45	1	1	2	3	1	1	2	2	4	3	3	2	5	0	0	0	0	0	1	0	1	0
4	R_d6keMltuNbX18nn	45	1	1	2	3	1	1	2	2	4	3	3	2	5	0	0	0	1	0	1	0	1	0
2	R_d6keMltuNbX18nn	45	1	1	2	3	1	1	2	2	4	3	3	2	10	0	0	1	0	0	1	0	0	1
6	R_d6keMltuNbX18nn	45	1	1	2	3	1	1	2	2	4	3	3	2	7	0	1	0	1	0	1	0	0	1
5	R_d6keMltuNbX18nn	45	1	1	2	3	1	1	2	2	4	3	3	2	9	0	0	1	1	0	1	0	0	1
4	R_2SpKDoriUHfYMIe	47	1	1	2	5	0	1	3	3	6	3	1	2	13	0	0	0	1	0	1	0	0	1
6	R_2SpKDoriUHfYMIe	47	1	1	2	5	0	1	3	3	6	3	1	2	14	0	1	0	1	0	1	0	0	1
5	R_2SpKDoriUHfYMIe	47	1	1	2	5	0	1	3	3	6	3	1	2	15	0	0	1	1	0	1	0	0	1
2	R_2SpKDoriUHfYMIe	47	1	1	2	5	0	1	3	3	6	3	1	2	15.99	0	0	1	0	0	1	0	0	1
1	R_2SpKDoriUHfYMIe	47	1	1	2	5	0	1	3	3	6	3	1	2	12	0	0	0	0	0	1	0	0	1
3	R_2SpKDoriUHfYMIe	47	1	1	2	5	0	1	3	3	6	3	1	2	14	0	1	0	0	0	1	0	0	1
6	R_1j9w3R1DMBPGkBo	29	1	1	2	4	0	1	2	3	6	3	4	2	7	0	1	0	1	0	1	0	0	1
3	R_1j9w3R1DMBPGkBo	29	1	1	2	4	0	1	2	3	6	3	4	2	4	0	1	0	0	0	1	0	1	0
5	R_1j9w3R1DMBPGkBo	29	1	1	2	4	0	1	2	3	6	3	4	2	9	0	0	1	1	0	1	0	0	1
4	R_1j9w3R1DMBPGkBo	29	1	1	2	4	0	1	2	3	6	3	4	2	7	0	0	0	1	0	1	0	0	1
1	R_1j9w3R1DMBPGkBo	29	1	1	2	4	0	1	2	3	6	3	4	2	3	0	0	0	0	0	1	0	1	0
2	R_1j9w3R1DMBPGkBo	29	1	1	2	4	0	1	2	3	6	3	4	2	3	0	0	1	0	0	1	0	1	0
3	R_1mW0UcAtMqxgJhW	60	1	1	5	5	1	1	2	3	6	2	7	2	0	0	1	0	0	0	1	0	1	0
2	R_1mW0UcAtMqxgJhW	60	1	1	5	5	1	1	2	3	6	2	7	2	5	0	0	1	0	0	1	0	1	0
1	R_1mW0UcAtMqxgJhW	60	1	1	5	5	1	1	2	3	6	2	7	2	0	0	0	0	0	0	1	0	1	0
5	R_1mW0UcAtMqxgJhW	60	1	1	5	5	1	1	2	3	6	2	7	2	10	0	0	1	1	0	1	0	0	1
4	R_1mW0UcAtMqxgJhW	60	1	1	5	5	1	1	2	3	6	2	7	2	6	0	0	0	1	0	1	0	0	1
6	R_1mW0UcAtMqxgJhW	60	1	1	5	5	1	1	2	3	6	2	7	2	6	0	1	0	1	0	1	0	0	1
6	R_1CsHrFFhHBRmjXL	21	1	1	5	2	0	1	4	4	5	3	5	2	7.5	0	1	0	1	0	1	0	0	1
5	R_1CsHrFFhHBRmjXL	21	1	1	5	2	0	1	4	4	5	3	5	2	12	0	0	1	1	0	1	0	0	1
3	R_1CsHrFFhHBRmjXL	21	1	1	5	2	0	1	4	4	5	3	5	2	7.25	0	1	0	0	0	1	0	0	1
2	R_1CsHrFFhHBRmjXL	21	1	1	5	2	0	1	4	4	5	3	5	2	9	0	0	1	0	0	1	0	0	1
1	R_1CsHrFFhHBRmjXL	21	1	1	5	2	0	1	4	4	5	3	5	2	6.5	0	0	0	0	0	1	0	0	1
4	R_1CsHrFFhHBRmjXL	21	1	1	5	2	0	1	4	4	5	3	5	2	7	0	0	0	1	0	1	0	0	1
1	R_2pWX6bmZwypbwYh	21	1	2	2	2	0	1	3	2	5	5	1	2	15	0	0	0	0	0	1	0	0	1
3	R_2pWX6bmZwypbwYh	21	1	2	2	2	0	1	3	2	5	5	1	2	20	0	1	0	0	0	1	0	0	1
2	R_2pWX6bmZwypbwYh	21	1	2	2	2	0	1	3	2	5	5	1	2	15	0	0	1	0	0	1	0	0	1
5	R_2pWX6bmZwypbwYh	21	1	2	2	2	0	1	3	2	5	5	1	2	20	0	0	1	1	0	1	0	0	1
4	R_2pWX6bmZwypbwYh	21	1	2	2	2	0	1	3	2	5	5	1	2	20	0	0	0	1	0	1	0	0	1
6	R_2pWX6bmZwypbwYh	21	1	2	2	2	0	1	3	2	5	5	1	2	20	0	1	0	1	0	1	0	0	1
4	R_a5b6ZSHXMWF2pSp	41	1	1	3	5	0	1	2	2	5	4	2	3	18	0	0	0	1	0	0	1	0	1
5	R_a5b6ZSHXMWF2pSp	41	1	1	3	5	0	1	2	2	5	4	2	3	22	0	0	1	1	0	0	1	0	1
3	R_a5b6ZSHXMWF2pSp	41	1	1	3	5	0	1	2	2	5	4	2	3	10	0	1	0	0	0	0	1	0	1
2	R_a5b6ZSHXMWF2pSp	41	1	1	3	5	0	1	2	2	5	4	2	3	10	0	0	1	0	0	0	1	0	1
1	R_a5b6ZSHXMWF2pSp	41	1	1	3	5	0	1	2	2	5	4	2	3	10	0	0	0	0	0	0	1	0	1
6	R_a5b6ZSHXMWF2pSp	41	1	1	3	5	0	1	2	2	5	4	2	3	25	0	1	0	1	0	0	1	0	1
2	R_6DOe5ic5YUo6rS1	46	1	1	3	4	1	1	2	2	5	4	5	3	10	0	0	1	0	0	0	1	0	1
3	R_6DOe5ic5YUo6rS1	46	1	1	3	4	1	1	2	2	5	4	5	3	10	0	1	0	0	0	0	1	0	1
4	R_6DOe5ic5YUo6rS1	46	1	1	3	4	1	1	2	2	5	4	5	3	8.5	0	0	0	1	0	0	1	0	1
5	R_6DOe5ic5YUo6rS1	46	1	1	3	4	1	1	2	2	5	4	5	3	9.5	0	0	1	1	0	0	1	0	1
1	R_6DOe5ic5YUo6rS1	46	1	1	3	4	1	1	2	2	5	4	5	3	12.5	0	0	0	0	0	0	1	0	1
6	R_6DOe5ic5YUo6rS1	46	1	1	3	4	1	1	2	2	5	4	5	3	8.5	0	1	0	1	0	0	1	0	1
2	R_24P1WvfQSNf9B5y	37	1	4	3	5	0	1	4	2	3	3	5	3	3	0	0	1	0	0	0	1	1	0
6	R_24P1WvfQSNf9B5y	37	1	4	3	5	0	1	4	2	3	3	5	3	3	0	1	0	1	0	0	1	1	0
3	R_24P1WvfQSNf9B5y	37	1	4	3	5	0	1	4	2	3	3	5	3	2	0	1	0	0	0	0	1	1	0
5	R_24P1WvfQSNf9B5y	37	1	4	3	5	0	1	4	2	3	3	5	3	3	0	0	1	1	0	0	1	1	0
1	R_24P1WvfQSNf9B5y	37	1	4	3	5	0	1	4	2	3	3	5	3	2	0	0	0	0	0	0	1	1	0
4	R_24P1WvfQSNf9B5y	37	1	4	3	5	0	1	4	2	3	3	5	3	3	0	0	0	1	0	0	1	1	0
5	R_733fGzPmkAQiwM1	56	0	1	2	4	1	1	3	3	6	4	4	3	15	0	0	1	1	0	0	1	0	1
1	R_733fGzPmkAQiwM1	56	0	1	2	4	1	1	3	3	6	4	4	3	12	0	0	0	0	0	0	1	0	1
2	R_733fGzPmkAQiwM1	56	0	1	2	4	1	1	3	3	6	4	4	3	0	0	0	1	0	0	0	1	1	0
3	R_733fGzPmkAQiwM1	56	0	1	2	4	1	1	3	3	6	4	4	3	13	0	1	0	0	0	0	1	0	1
4	R_733fGzPmkAQiwM1	56	0	1	2	4	1	1	3	3	6	4	4	3	15	0	0	0	1	0	0	1	0	1
6	R_733fGzPmkAQiwM1	56	0	1	2	4	1	1	3	3	6	4	4	3	19	0	1	0	1	0	0	1	0	1
2	R_1pEHgx3zGUgOKbX	24	1	4	1	4	0	1	4	3	4	5	3	3	8	0	0	1	0	0	0	1	0	1
5	R_1pEHgx3zGUgOKbX	24	1	4	1	4	0	1	4	3	4	5	3	3	8	0	0	1	1	0	0	1	0	1
6	R_1pEHgx3zGUgOKbX	24	1	4	1	4	0	1	4	3	4	5	3	3	7	0	1	0	1	0	0	1	0	1
4	R_1pEHgx3zGUgOKbX	24	1	4	1	4	0	1	4	3	4	5	3	3	6	0	0	0	1	0	0	1	0	1
3	R_1pEHgx3zGUgOKbX	24	1	4	1	4	0	1	4	3	4	5	3	3	6	0	1	0	0	0	0	1	0	1
1	R_1pEHgx3zGUgOKbX	24	1	4	1	4	0	1	4	3	4	5	3	3	5	0	0	0	0	0	0	1	1	0
6	R_1gdxf1iPddivbIH	56	1	1	2	1	1	1	2	1	4	2	5	3	10	0	1	0	1	0	0	1	0	1
3	R_1gdxf1iPddivbIH	56	1	1	2	1	1	1	2	1	4	2	5	3	8.5	0	1	0	0	0	0	1	0	1
1	R_1gdxf1iPddivbIH	56	1	1	2	1	1	1	2	1	4	2	5	3	7.5	0	0	0	0	0	0	1	0	1
5	R_1gdxf1iPddivbIH	56	1	1	2	1	1	1	2	1	4	2	5	3	12.5	0	0	1	1	0	0	1	0	1
4	R_1gdxf1iPddivbIH	56	1	1	2	1	1	1	2	1	4	2	5	3	10	0	0	0	1	0	0	1	0	1
2	R_1gdxf1iPddivbIH	56	1	1	2	1	1	1	2	1	4	2	5	3	12	0	0	1	0	0	0	1	0	1
6	R_OImKKeEAufFDmJr	30	1	1	4	4	1	1	2	2	4	2	5	3	11.99	0	1	0	1	0	0	1	0	1
5	R_OImKKeEAufFDmJr	30	1	1	4	4	1	1	2	2	4	2	5	3	13.99	0	0	1	1	0	0	1	0	1
3	R_OImKKeEAufFDmJr	30	1	1	4	4	1	1	2	2	4	2	5	3	9.9899998	0	1	0	0	0	0	1	0	1
2	R_OImKKeEAufFDmJr	30	1	1	4	4	1	1	2	2	4	2	5	3	12.99	0	0	1	0	0	0	1	0	1
1	R_OImKKeEAufFDmJr	30	1	1	4	4	1	1	2	2	4	2	5	3	9.9899998	0	0	0	0	0	0	1	0	1
4	R_OImKKeEAufFDmJr	30	1	1	4	4	1	1	2	2	4	2	5	3	10.99	0	0	0	1	0	0	1	0	1
6	R_UZ9uAne3HiaEM0N	36	0	1	3	4	1	0	1	1	4	3	5	3	12.99	0	1	0	1	0	0	1	0	1
4	R_UZ9uAne3HiaEM0N	36	0	1	3	4	1	0	1	1	4	3	5	3	11.99	0	0	0	1	0	0	1	0	1
1	R_UZ9uAne3HiaEM0N	36	0	1	3	4	1	0	1	1	4	3	5	3	12.99	0	0	0	0	0	0	1	0	1
2	R_UZ9uAne3HiaEM0N	36	0	1	3	4	1	0	1	1	4	3	5	3	13.99	0	0	1	0	0	0	1	0	1
5	R_UZ9uAne3HiaEM0N	36	0	1	3	4	1	0	1	1	4	3	5	3	13.99	0	0	1	1	0	0	1	0	1
3	R_UZ9uAne3HiaEM0N	36	0	1	3	4	1	0	1	1	4	3	5	3	13.99	0	1	0	0	0	0	1	0	1
1	R_2X0C631vlK8IOMq	54	1	1	2	3	1	1	3	3	3	2	1	3	8	0	0	0	0	0	0	1	0	1
2	R_2X0C631vlK8IOMq	54	1	1	2	3	1	1	3	3	3	2	1	3	14	0	0	1	0	0	0	1	0	1
3	R_2X0C631vlK8IOMq	54	1	1	2	3	1	1	3	3	3	2	1	3	14	0	1	0	0	0	0	1	0	1
4	R_2X0C631vlK8IOMq	54	1	1	2	3	1	1	3	3	3	2	1	3	8	0	0	0	1	0	0	1	0	1
5	R_2X0C631vlK8IOMq	54	1	1	2	3	1	1	3	3	3	2	1	3	10	0	0	1	1	0	0	1	0	1
6	R_2X0C631vlK8IOMq	54	1	1	2	3	1	1	3	3	3	2	1	3	8	0	1	0	1	0	0	1	0	1
4	R_334gx45dvmOYrSo	56	1	1	3	4	1	1	1	1	7	3	1	3	11	0	0	0	1	0	0	1	0	1
3	R_334gx45dvmOYrSo	56	1	1	3	4	1	1	1	1	7	3	1	3	10.25	0	1	0	0	0	0	1	0	1
5	R_334gx45dvmOYrSo	56	1	1	3	4	1	1	1	1	7	3	1	3	12	0	0	1	1	0	0	1	0	1
1	R_334gx45dvmOYrSo	56	1	1	3	4	1	1	1	1	7	3	1	3	10	0	0	0	0	0	0	1	0	1
2	R_334gx45dvmOYrSo	56	1	1	3	4	1	1	1	1	7	3	1	3	10.5	0	0	1	0	0	0	1	0	1
6	R_334gx45dvmOYrSo	56	1	1	3	4	1	1	1	1	7	3	1	3	10	0	1	0	1	0	0	1	0	1
5	R_3ek8cOSul0MkbOS	73	2	1	2	5	1	1	2	2	7	2	2	3	6	0	0	1	1	0	0	1	0	1
1	R_3ek8cOSul0MkbOS	73	2	1	2	5	1	1	2	2	7	2	2	3	6	0	0	0	0	0	0	1	0	1
2	R_3ek8cOSul0MkbOS	73	2	1	2	5	1	1	2	2	7	2	2	3	6	0	0	1	0	0	0	1	0	1
6	R_3ek8cOSul0MkbOS	73	2	1	2	5	1	1	2	2	7	2	2	3	6	0	1	0	1	0	0	1	0	1
3	R_3ek8cOSul0MkbOS	73	2	1	2	5	1	1	2	2	7	2	2	3	6	0	1	0	0	0	0	1	0	1
4	R_3ek8cOSul0MkbOS	73	2	1	2	5	1	1	2	2	7	2	2	3	6	0	0	0	1	0	0	1	0	1
1	R_2otBmt5fOfd8tBT	23	0	3	2	4	0	1	3	2	4	2	7	3	13	0	0	0	0	0	0	1	0	1
6	R_2otBmt5fOfd8tBT	23	0	3	2	4	0	1	3	2	4	2	7	3	14	0	1	0	1	0	0	1	0	1
4	R_2otBmt5fOfd8tBT	23	0	3	2	4	0	1	3	2	4	2	7	3	10	0	0	0	1	0	0	1	0	1
3	R_2otBmt5fOfd8tBT	23	0	3	2	4	0	1	3	2	4	2	7	3	13	0	1	0	0	0	0	1	0	1
5	R_2otBmt5fOfd8tBT	23	0	3	2	4	0	1	3	2	4	2	7	3	10	0	0	1	1	0	0	1	0	1
2	R_2otBmt5fOfd8tBT	23	0	3	2	4	0	1	3	2	4	2	7	3	13.5	0	0	1	0	0	0	1	0	1
4	R_2ceoa3J1YFO1V5F	60	1	1	3	3	0	1	2	3	4	4	9	3	17.99	0	0	0	1	0	0	1	0	1
6	R_2ceoa3J1YFO1V5F	60	1	1	3	3	0	1	2	3	4	4	9	3	16.99	0	1	0	1	0	0	1	0	1
2	R_2ceoa3J1YFO1V5F	60	1	1	3	3	0	1	2	3	4	4	9	3	17.99	0	0	1	0	0	0	1	0	1
5	R_2ceoa3J1YFO1V5F	60	1	1	3	3	0	1	2	3	4	4	9	3	22.99	0	0	1	1	0	0	1	0	1
3	R_2ceoa3J1YFO1V5F	60	1	1	3	3	0	1	2	3	4	4	9	3	18.99	0	1	0	0	0	0	1	0	1
1	R_2ceoa3J1YFO1V5F	60	1	1	3	3	0	1	2	3	4	4	9	3	12.99	0	0	0	0	0	0	1	0	1
6	R_dcknl2YPTRgDA1r	41	1	3	3	5	1	1	3	3	6	4	1	3	11.5	0	1	0	1	0	0	1	0	1
1	R_dcknl2YPTRgDA1r	41	1	3	3	5	1	1	3	3	6	4	1	3	10	0	0	0	0	0	0	1	0	1
2	R_dcknl2YPTRgDA1r	41	1	3	3	5	1	1	3	3	6	4	1	3	11	0	0	1	0	0	0	1	0	1
5	R_dcknl2YPTRgDA1r	41	1	3	3	5	1	1	3	3	6	4	1	3	12	0	0	1	1	0	0	1	0	1
4	R_dcknl2YPTRgDA1r	41	1	3	3	5	1	1	3	3	6	4	1	3	10	0	0	0	1	0	0	1	0	1
3	R_dcknl2YPTRgDA1r	41	1	3	3	5	1	1	3	3	6	4	1	3	12.5	0	1	0	0	0	0	1	0	1
3	R_tRFGGcDakAHiBBD	21	0	1	2	4	0	1	3	2	4	3	2	3	14.5	0	1	0	0	0	0	1	0	1
5	R_tRFGGcDakAHiBBD	21	0	1	2	4	0	1	3	2	4	3	2	3	19.200001	0	0	1	1	0	0	1	0	1
2	R_tRFGGcDakAHiBBD	21	0	1	2	4	0	1	3	2	4	3	2	3	11	0	0	1	0	0	0	1	0	1
4	R_tRFGGcDakAHiBBD	21	0	1	2	4	0	1	3	2	4	3	2	3	20.299999	0	0	0	1	0	0	1	0	1
1	R_tRFGGcDakAHiBBD	21	0	1	2	4	0	1	3	2	4	3	2	3	10	0	0	0	0	0	0	1	0	1
6	R_tRFGGcDakAHiBBD	21	0	1	2	4	0	1	3	2	4	3	2	3	20.16	0	1	0	1	0	0	1	0	1
3	R_T0N1AbHNYyfBlVD	22	1	3	3	4	0	1	4	2	6	2	1	3	13.99	0	1	0	0	0	0	1	0	1
4	R_T0N1AbHNYyfBlVD	22	1	3	3	4	0	1	4	2	6	2	1	3	11	0	0	0	1	0	0	1	0	1
2	R_T0N1AbHNYyfBlVD	22	1	3	3	4	0	1	4	2	6	2	1	3	15	0	0	1	0	0	0	1	0	1
1	R_T0N1AbHNYyfBlVD	22	1	3	3	4	0	1	4	2	6	2	1	3	13	0	0	0	0	0	0	1	0	1
6	R_T0N1AbHNYyfBlVD	22	1	3	3	4	0	1	4	2	6	2	1	3	14	0	1	0	1	0	0	1	0	1
5	R_T0N1AbHNYyfBlVD	22	1	3	3	4	0	1	4	2	6	2	1	3	15.5	0	0	1	1	0	0	1	0	1
1	R_3kha0tsF3ElyQwL	45	1	1	3	3	1	1	3	4	2	2	10	3	0	0	0	0	0	0	0	1	1	0
2	R_3kha0tsF3ElyQwL	45	1	1	3	3	1	1	3	4	2	2	10	3	15	0	0	1	0	0	0	1	0	1
5	R_3kha0tsF3ElyQwL	45	1	1	3	3	1	1	3	4	2	2	10	3	16	0	0	1	1	0	0	1	0	1
4	R_3kha0tsF3ElyQwL	45	1	1	3	3	1	1	3	4	2	2	10	3	0	0	0	0	1	0	0	1	1	0
6	R_3kha0tsF3ElyQwL	45	1	1	3	3	1	1	3	4	2	2	10	3	5	0	1	0	1	0	0	1	1	0
3	R_3kha0tsF3ElyQwL	45	1	1	3	3	1	1	3	4	2	2	10	3	0	0	1	0	0	0	0	1	1	0
3	R_22WAFhYVHzdptBD	53	1	4	2	1	1	0	2	2	2	2	5	3	6	0	1	0	0	0	0	1	0	1
4	R_22WAFhYVHzdptBD	53	1	4	2	1	1	0	2	2	2	2	5	3	6	0	0	0	1	0	0	1	0	1
5	R_22WAFhYVHzdptBD	53	1	4	2	1	1	0	2	2	2	2	5	3	6	0	0	1	1	0	0	1	0	1
1	R_22WAFhYVHzdptBD	53	1	4	2	1	1	0	2	2	2	2	5	3	8	0	0	0	0	0	0	1	0	1
2	R_22WAFhYVHzdptBD	53	1	4	2	1	1	0	2	2	2	2	5	3	8	0	0	1	0	0	0	1	0	1
6	R_22WAFhYVHzdptBD	53	1	4	2	1	1	0	2	2	2	2	5	3	6	0	1	0	1	0	0	1	0	1
3	R_XMMTocgZUDGC7h7	51	1	1	3	2	1	1	1	2	2	2	2	3	11.99	0	1	0	0	0	0	1	0	1
2	R_XMMTocgZUDGC7h7	51	1	1	3	2	1	1	1	2	2	2	2	3	10	0	0	1	0	0	0	1	0	1
1	R_XMMTocgZUDGC7h7	51	1	1	3	2	1	1	1	2	2	2	2	3	11	0	0	0	0	0	0	1	0	1
5	R_XMMTocgZUDGC7h7	51	1	1	3	2	1	1	1	2	2	2	2	3	10.99	0	0	1	1	0	0	1	0	1
6	R_XMMTocgZUDGC7h7	51	1	1	3	2	1	1	1	2	2	2	2	3	10.99	0	1	0	1	0	0	1	0	1
4	R_XMMTocgZUDGC7h7	51	1	1	3	2	1	1	1	2	2	2	2	3	10.99	0	0	0	1	0	0	1	0	1
6	R_3FKD1f8OK9fwqxS	29	1	1	4	5	0	1	2	4	4	3	5	3	6	0	1	0	1	0	0	1	0	1
1	R_3FKD1f8OK9fwqxS	29	1	1	4	5	0	1	2	4	4	3	5	3	5	0	0	0	0	0	0	1	1	0
5	R_3FKD1f8OK9fwqxS	29	1	1	4	5	0	1	2	4	4	3	5	3	6	0	0	1	1	0	0	1	0	1
4	R_3FKD1f8OK9fwqxS	29	1	1	4	5	0	1	2	4	4	3	5	3	6	0	0	0	1	0	0	1	0	1
3	R_3FKD1f8OK9fwqxS	29	1	1	4	5	0	1	2	4	4	3	5	3	5	0	1	0	0	0	0	1	1	0
2	R_3FKD1f8OK9fwqxS	29	1	1	4	5	0	1	2	4	4	3	5	3	5	0	0	1	0	0	0	1	1	0
1	R_332TqKep5koxF24	29	1	1	3	5	0	1	3	3	6	4	3	3	5	0	0	0	0	0	0	1	1	0
3	R_332TqKep5koxF24	29	1	1	3	5	0	1	3	3	6	4	3	3	6	0	1	0	0	0	0	1	0	1
4	R_332TqKep5koxF24	29	1	1	3	5	0	1	3	3	6	4	3	3	5	0	0	0	1	0	0	1	1	0
2	R_332TqKep5koxF24	29	1	1	3	5	0	1	3	3	6	4	3	3	6	0	0	1	0	0	0	1	0	1
5	R_332TqKep5koxF24	29	1	1	3	5	0	1	3	3	6	4	3	3	7	0	0	1	1	0	0	1	0	1
6	R_332TqKep5koxF24	29	1	1	3	5	0	1	3	3	6	4	3	3	6	0	1	0	1	0	0	1	0	1
3	R_1pXQg8DCbhiVrz6	66	1	1	4	5	1	1	1	3	7	5	7	3	14.5	0	1	0	0	0	0	1	0	1
5	R_1pXQg8DCbhiVrz6	66	1	1	4	5	1	1	1	3	7	5	7	3	12.5	0	0	1	1	0	0	1	0	1
6	R_1pXQg8DCbhiVrz6	66	1	1	4	5	1	1	1	3	7	5	7	3	12.75	0	1	0	1	0	0	1	0	1
1	R_1pXQg8DCbhiVrz6	66	1	1	4	5	1	1	1	3	7	5	7	3	11.5	0	0	0	0	0	0	1	0	1
2	R_1pXQg8DCbhiVrz6	66	1	1	4	5	1	1	1	3	7	5	7	3	18.99	0	0	1	0	0	0	1	0	1
4	R_1pXQg8DCbhiVrz6	66	1	1	4	5	1	1	1	3	7	5	7	3	13.5	0	0	0	1	0	0	1	0	1
2	R_1d00lATix7409bI	22	1	2	1	4	0	0	3	1	4	3	2	3	12	0	0	1	0	0	0	1	0	1
1	R_1d00lATix7409bI	22	1	2	1	4	0	0	3	1	4	3	2	3	10	0	0	0	0	0	0	1	0	1
6	R_1d00lATix7409bI	22	1	2	1	4	0	0	3	1	4	3	2	3	10	0	1	0	1	0	0	1	0	1
4	R_1d00lATix7409bI	22	1	2	1	4	0	0	3	1	4	3	2	3	10	0	0	0	1	0	0	1	0	1
3	R_1d00lATix7409bI	22	1	2	1	4	0	0	3	1	4	3	2	3	11	0	1	0	0	0	0	1	0	1
5	R_1d00lATix7409bI	22	1	2	1	4	0	0	3	1	4	3	2	3	10	0	0	1	1	0	0	1	0	1
4	R_3Ic31oXHYPjCLhj	40	1	1	2	2	1	0	2	1	6	6	1	3	3.99	0	0	0	1	0	0	1	1	0
2	R_3Ic31oXHYPjCLhj	40	1	1	2	2	1	0	2	1	6	6	1	3	5.9899998	0	0	1	0	0	0	1	1	0
5	R_3Ic31oXHYPjCLhj	40	1	1	2	2	1	0	2	1	6	6	1	3	5.9899998	0	0	1	1	0	0	1	1	0
6	R_3Ic31oXHYPjCLhj	40	1	1	2	2	1	0	2	1	6	6	1	3	4	0	1	0	1	0	0	1	1	0
3	R_3Ic31oXHYPjCLhj	40	1	1	2	2	1	0	2	1	6	6	1	3	4.9899998	0	1	0	0	0	0	1	1	0
1	R_3Ic31oXHYPjCLhj	40	1	1	2	2	1	0	2	1	6	6	1	3	4.9899998	0	0	0	0	0	0	1	1	0
6	R_2c6M9DxKx0NlyFg	52	1	1	3	3	0	1	3	3	4	3	5	3	13.99	0	1	0	1	0	0	1	0	1
5	R_2c6M9DxKx0NlyFg	52	1	1	3	3	0	1	3	3	4	3	5	3	14.99	0	0	1	1	0	0	1	0	1
3	R_2c6M9DxKx0NlyFg	52	1	1	3	3	0	1	3	3	4	3	5	3	11.5	0	1	0	0	0	0	1	0	1
1	R_2c6M9DxKx0NlyFg	52	1	1	3	3	0	1	3	3	4	3	5	3	9	0	0	0	0	0	0	1	0	1
4	R_2c6M9DxKx0NlyFg	52	1	1	3	3	0	1	3	3	4	3	5	3	11	0	0	0	1	0	0	1	0	1
2	R_2c6M9DxKx0NlyFg	52	1	1	3	3	0	1	3	3	4	3	5	3	13	0	0	1	0	0	0	1	0	1
5	R_2WHBxdHJQB2MHvB	21	1	1	2	4	0	1	2	2	6	4	2	3	30	0	0	1	1	0	0	1	0	1
4	R_2WHBxdHJQB2MHvB	21	1	1	2	4	0	1	2	2	6	4	2	3	21	0	0	0	1	0	0	1	0	1
2	R_2WHBxdHJQB2MHvB	21	1	1	2	4	0	1	2	2	6	4	2	3	24	0	0	1	0	0	0	1	0	1
6	R_2WHBxdHJQB2MHvB	21	1	1	2	4	0	1	2	2	6	4	2	3	25	0	1	0	1	0	0	1	0	1
1	R_2WHBxdHJQB2MHvB	21	1	1	2	4	0	1	2	2	6	4	2	3	20	0	0	0	0	0	0	1	0	1
3	R_2WHBxdHJQB2MHvB	21	1	1	2	4	0	1	2	2	6	4	2	3	26	0	1	0	0	0	0	1	0	1
1	R_3kHdQlifns5IdbJ	22	1	1	5	4	0	1	2	3	6	4	1	3	15	0	0	0	0	0	0	1	0	1
6	R_3kHdQlifns5IdbJ	22	1	1	5	4	0	1	2	3	6	4	1	3	17	0	1	0	1	0	0	1	0	1
2	R_3kHdQlifns5IdbJ	22	1	1	5	4	0	1	2	3	6	4	1	3	17	0	0	1	0	0	0	1	0	1
3	R_3kHdQlifns5IdbJ	22	1	1	5	4	0	1	2	3	6	4	1	3	15.5	0	1	0	0	0	0	1	0	1
4	R_3kHdQlifns5IdbJ	22	1	1	5	4	0	1	2	3	6	4	1	3	11	0	0	0	1	0	0	1	0	1
5	R_3kHdQlifns5IdbJ	22	1	1	5	4	0	1	2	3	6	4	1	3	22	0	0	1	1	0	0	1	0	1
5	R_4NoGxGsb8bDHjQR	23	1	1	1	4	0	1	4	3	5	3	4	3	25	0	0	1	1	0	0	1	0	1
2	R_4NoGxGsb8bDHjQR	23	1	1	1	4	0	1	4	3	5	3	4	3	16	0	0	1	0	0	0	1	0	1
1	R_4NoGxGsb8bDHjQR	23	1	1	1	4	0	1	4	3	5	3	4	3	12	0	0	0	0	0	0	1	0	1
3	R_4NoGxGsb8bDHjQR	23	1	1	1	4	0	1	4	3	5	3	4	3	20	0	1	0	0	0	0	1	0	1
6	R_4NoGxGsb8bDHjQR	23	1	1	1	4	0	1	4	3	5	3	4	3	24	0	1	0	1	0	0	1	0	1
4	R_4NoGxGsb8bDHjQR	23	1	1	1	4	0	1	4	3	5	3	4	3	21	0	0	0	1	0	0	1	0	1
1	R_Rt4UkIX5FAlWodb	61	1	1	2	5	0	1	2	2	6	4	1	3	12.95	0	0	0	0	0	0	1	0	1
2	R_Rt4UkIX5FAlWodb	61	1	1	2	5	0	1	2	2	6	4	1	3	11.95	0	0	1	0	0	0	1	0	1
3	R_Rt4UkIX5FAlWodb	61	1	1	2	5	0	1	2	2	6	4	1	3	12.95	0	1	0	0	0	0	1	0	1
5	R_Rt4UkIX5FAlWodb	61	1	1	2	5	0	1	2	2	6	4	1	3	14.95	0	0	1	1	0	0	1	0	1
6	R_Rt4UkIX5FAlWodb	61	1	1	2	5	0	1	2	2	6	4	1	3	14.95	0	1	0	1	0	0	1	0	1
4	R_Rt4UkIX5FAlWodb	61	1	1	2	5	0	1	2	2	6	4	1	3	10.59	0	0	0	1	0	0	1	0	1
5	R_2CkeiN03QVi9EJd	34	1	6	1	4	0	1	4	4	6	4	1	3	18	0	0	1	1	0	0	1	0	1
6	R_2CkeiN03QVi9EJd	34	1	6	1	4	0	1	4	4	6	4	1	3	18	0	1	0	1	0	0	1	0	1
2	R_2CkeiN03QVi9EJd	34	1	6	1	4	0	1	4	4	6	4	1	3	18	0	0	1	0	0	0	1	0	1
4	R_2CkeiN03QVi9EJd	34	1	6	1	4	0	1	4	4	6	4	1	3	13	0	0	0	1	0	0	1	0	1
3	R_2CkeiN03QVi9EJd	34	1	6	1	4	0	1	4	4	6	4	1	3	15	0	1	0	0	0	0	1	0	1
1	R_2CkeiN03QVi9EJd	34	1	6	1	4	0	1	4	4	6	4	1	3	12	0	0	0	0	0	0	1	0	1
3	R_1YOMbINJElpAhEd	24	1	4	1	4	0	0	2	2	4	3	1	3	14	0	1	0	0	0	0	1	0	1
4	R_1YOMbINJElpAhEd	24	1	4	1	4	0	0	2	2	4	3	1	3	11	0	0	0	1	0	0	1	0	1
2	R_1YOMbINJElpAhEd	24	1	4	1	4	0	0	2	2	4	3	1	3	15	0	0	1	0	0	0	1	0	1
1	R_1YOMbINJElpAhEd	24	1	4	1	4	0	0	2	2	4	3	1	3	12	0	0	0	0	0	0	1	0	1
6	R_1YOMbINJElpAhEd	24	1	4	1	4	0	0	2	2	4	3	1	3	13	0	1	0	1	0	0	1	0	1
5	R_1YOMbINJElpAhEd	24	1	4	1	4	0	0	2	2	4	3	1	3	14	0	0	1	1	0	0	1	0	1
3	R_32JzkfLa45Th9G2	33	1	1	2	5	0	1	2	2	4	3	4	3	25	0	1	0	0	0	0	1	0	1
1	R_32JzkfLa45Th9G2	33	1	1	2	5	0	1	2	2	4	3	4	3	19	0	0	0	0	0	0	1	0	1
2	R_32JzkfLa45Th9G2	33	1	1	2	5	0	1	2	2	4	3	4	3	30	0	0	1	0	0	0	1	0	1
4	R_32JzkfLa45Th9G2	33	1	1	2	5	0	1	2	2	4	3	4	3	15	0	0	0	1	0	0	1	0	1
6	R_32JzkfLa45Th9G2	33	1	1	2	5	0	1	2	2	4	3	4	3	20	0	1	0	1	0	0	1	0	1
5	R_32JzkfLa45Th9G2	33	1	1	2	5	0	1	2	2	4	3	4	3	25	0	0	1	1	0	0	1	0	1
2	R_1DB9kAB4JzSZbeJ	56	1	1	2	2	0	1	3	2	4	3	10	3	15	1	0	1	0	0	0	1	0	1
3	R_1DB9kAB4JzSZbeJ	56	1	1	2	2	0	1	3	2	4	3	10	3	10	1	1	0	0	0	0	1	0	1
4	R_1DB9kAB4JzSZbeJ	56	1	1	2	2	0	1	3	2	4	3	10	3	10	1	0	0	1	0	0	1	0	1
1	R_1DB9kAB4JzSZbeJ	56	1	1	2	2	0	1	3	2	4	3	10	3	10	1	0	0	0	0	0	1	0	1
5	R_1DB9kAB4JzSZbeJ	56	1	1	2	2	0	1	3	2	4	3	10	3	15	1	0	1	1	0	0	1	0	1
6	R_1DB9kAB4JzSZbeJ	56	1	1	2	2	0	1	3	2	4	3	10	3	10	1	1	0	1	0	0	1	0	1
2	R_2DXPVX4Td231hjs	55	1	1	5	5	1	1	2	2	5	3	5	3	10	0	0	1	0	0	0	1	0	1
3	R_2DXPVX4Td231hjs	55	1	1	5	5	1	1	2	2	5	3	5	3	9	0	1	0	0	0	0	1	0	1
4	R_2DXPVX4Td231hjs	55	1	1	5	5	1	1	2	2	5	3	5	3	7	0	0	0	1	0	0	1	0	1
6	R_2DXPVX4Td231hjs	55	1	1	5	5	1	1	2	2	5	3	5	3	18	0	1	0	1	0	0	1	0	1
1	R_2DXPVX4Td231hjs	55	1	1	5	5	1	1	2	2	5	3	5	3	7	0	0	0	0	0	0	1	0	1
5	R_2DXPVX4Td231hjs	55	1	1	5	5	1	1	2	2	5	3	5	3	20	0	0	1	1	0	0	1	0	1
1	R_2Vm37iqCeackO4D	52	1	1	2	2	1	1	2	2	6	5	4	3	5	0	0	0	0	0	0	1	1	0
3	R_2Vm37iqCeackO4D	52	1	1	2	2	1	1	2	2	6	5	4	3	4	0	1	0	0	0	0	1	1	0
5	R_2Vm37iqCeackO4D	52	1	1	2	2	1	1	2	2	6	5	4	3	4	0	0	1	1	0	0	1	1	0
2	R_2Vm37iqCeackO4D	52	1	1	2	2	1	1	2	2	6	5	4	3	5	0	0	1	0	0	0	1	1	0
4	R_2Vm37iqCeackO4D	52	1	1	2	2	1	1	2	2	6	5	4	3	5	0	0	0	1	0	0	1	1	0
6	R_2Vm37iqCeackO4D	52	1	1	2	2	1	1	2	2	6	5	4	3	5	0	1	0	1	0	0	1	1	0
1	R_1H8kmgzYukQWp9Q	25	1	2	1	4	0	1	3	3	4	3	7	3	10.5	0	0	0	0	0	0	1	0	1
6	R_1H8kmgzYukQWp9Q	25	1	2	1	4	0	1	3	3	4	3	7	3	15	0	1	0	1	0	0	1	0	1
3	R_1H8kmgzYukQWp9Q	25	1	2	1	4	0	1	3	3	4	3	7	3	12	0	1	0	0	0	0	1	0	1
4	R_1H8kmgzYukQWp9Q	25	1	2	1	4	0	1	3	3	4	3	7	3	14.5	0	0	0	1	0	0	1	0	1
2	R_1H8kmgzYukQWp9Q	25	1	2	1	4	0	1	3	3	4	3	7	3	15	0	0	1	0	0	0	1	0	1
5	R_1H8kmgzYukQWp9Q	25	1	2	1	4	0	1	3	3	4	3	7	3	18	0	0	1	1	0	0	1	0	1
6	R_2AKcJPO4cQTn4km	37	0	1	2	6	0	0	2	2	5	2	1	3	7.5	0	1	0	1	0	0	1	0	1
5	R_2AKcJPO4cQTn4km	37	0	1	2	6	0	0	2	2	5	2	1	3	11	0	0	1	1	0	0	1	0	1
3	R_2AKcJPO4cQTn4km	37	0	1	2	6	0	0	2	2	5	2	1	3	11	0	1	0	0	0	0	1	0	1
4	R_2AKcJPO4cQTn4km	37	0	1	2	6	0	0	2	2	5	2	1	3	5	0	0	0	1	0	0	1	1	0
1	R_2AKcJPO4cQTn4km	37	0	1	2	6	0	0	2	2	5	2	1	3	7	0	0	0	0	0	0	1	0	1
2	R_2AKcJPO4cQTn4km	37	0	1	2	6	0	0	2	2	5	2	1	3	4.5	0	0	1	0	0	0	1	1	0
6	R_Z7rFuNkJkNf4nIt	65	0	1	2	4	1	1	4	3	6	3	9	3	7	0	1	0	1	0	0	1	0	1
5	R_Z7rFuNkJkNf4nIt	65	0	1	2	4	1	1	4	3	6	3	9	3	8	0	0	1	1	0	0	1	0	1
3	R_Z7rFuNkJkNf4nIt	65	0	1	2	4	1	1	4	3	6	3	9	3	7	0	1	0	0	0	0	1	0	1
1	R_Z7rFuNkJkNf4nIt	65	0	1	2	4	1	1	4	3	6	3	9	3	5	0	0	0	0	0	0	1	1	0
2	R_Z7rFuNkJkNf4nIt	65	0	1	2	4	1	1	4	3	6	3	9	3	7	0	0	1	0	0	0	1	0	1
4	R_Z7rFuNkJkNf4nIt	65	0	1	2	4	1	1	4	3	6	3	9	3	5	0	0	0	1	0	0	1	1	0
1	R_24nJSkoxnkVGi7Y	27	1	1	2	3	0	0	2	3	5	5	2	3	11.99	0	0	0	0	0	0	1	0	1
4	R_24nJSkoxnkVGi7Y	27	1	1	2	3	0	0	2	3	5	5	2	3	11.99	0	0	0	1	0	0	1	0	1
2	R_24nJSkoxnkVGi7Y	27	1	1	2	3	0	0	2	3	5	5	2	3	14.99	0	0	1	0	0	0	1	0	1
5	R_24nJSkoxnkVGi7Y	27	1	1	2	3	0	0	2	3	5	5	2	3	21.99	0	0	1	1	0	0	1	0	1
3	R_24nJSkoxnkVGi7Y	27	1	1	2	3	0	0	2	3	5	5	2	3	17.99	0	1	0	0	0	0	1	0	1
6	R_24nJSkoxnkVGi7Y	27	1	1	2	3	0	0	2	3	5	5	2	3	17.99	0	1	0	1	0	0	1	0	1
5	R_1CDW7s7ZiL6B7Ia	28	1	3	2	4	1	1	3	3	3	2	6	3	13	0	0	1	1	0	0	1	0	1
4	R_1CDW7s7ZiL6B7Ia	28	1	3	2	4	1	1	3	3	3	2	6	3	10	0	0	0	1	0	0	1	0	1
2	R_1CDW7s7ZiL6B7Ia	28	1	3	2	4	1	1	3	3	3	2	6	3	13	0	0	1	0	0	0	1	0	1
6	R_1CDW7s7ZiL6B7Ia	28	1	3	2	4	1	1	3	3	3	2	6	3	12	0	1	0	1	0	0	1	0	1
1	R_1CDW7s7ZiL6B7Ia	28	1	3	2	4	1	1	3	3	3	2	6	3	11	0	0	0	0	0	0	1	0	1
3	R_1CDW7s7ZiL6B7Ia	28	1	3	2	4	1	1	3	3	3	2	6	3	12	0	1	0	0	0	0	1	0	1
1	R_1OIDze4BpYtOSfb	62	1	1	3	3	1	0	2	2	3	4	9	3	9	0	0	0	0	0	0	1	0	1
6	R_1OIDze4BpYtOSfb	62	1	1	3	3	1	0	2	2	3	4	9	3	12	0	1	0	1	0	0	1	0	1
2	R_1OIDze4BpYtOSfb	62	1	1	3	3	1	0	2	2	3	4	9	3	12.5	0	0	1	0	0	0	1	0	1
5	R_1OIDze4BpYtOSfb	62	1	1	3	3	1	0	2	2	3	4	9	3	12.5	0	0	1	1	0	0	1	0	1
3	R_1OIDze4BpYtOSfb	62	1	1	3	3	1	0	2	2	3	4	9	3	10	0	1	0	0	0	0	1	0	1
4	R_1OIDze4BpYtOSfb	62	1	1	3	3	1	0	2	2	3	4	9	3	9.75	0	0	0	1	0	0	1	0	1
2	R_3hm6AQyUAVk2hxu	32	1	1	3	5	1	1	3	3	4	3	6	3	22.790001	0	0	1	0	0	0	1	0	1
5	R_3hm6AQyUAVk2hxu	32	1	1	3	5	1	1	3	3	4	3	6	3	23.459999	0	0	1	1	0	0	1	0	1
4	R_3hm6AQyUAVk2hxu	32	1	1	3	5	1	1	3	3	4	3	6	3	25.49	0	0	0	1	0	0	1	0	1
3	R_3hm6AQyUAVk2hxu	32	1	1	3	5	1	1	3	3	4	3	6	3	18.280001	0	1	0	0	0	0	1	0	1
6	R_3hm6AQyUAVk2hxu	32	1	1	3	5	1	1	3	3	4	3	6	3	19.790001	0	1	0	1	0	0	1	0	1
1	R_3hm6AQyUAVk2hxu	32	1	1	3	5	1	1	3	3	4	3	6	3	12.5	0	0	0	0	0	0	1	0	1
5	R_1dHcgCCxoDJf5nR	56	0	1	4	4	0	1	3	3	6	3	2	3	8.5	0	0	1	1	0	0	1	0	1
6	R_1dHcgCCxoDJf5nR	56	0	1	4	4	0	1	3	3	6	3	2	3	8	0	1	0	1	0	0	1	0	1
1	R_1dHcgCCxoDJf5nR	56	0	1	4	4	0	1	3	3	6	3	2	3	9	0	0	0	0	0	0	1	0	1
4	R_1dHcgCCxoDJf5nR	56	0	1	4	4	0	1	3	3	6	3	2	3	7.5	0	0	0	1	0	0	1	0	1
2	R_1dHcgCCxoDJf5nR	56	0	1	4	4	0	1	3	3	6	3	2	3	8	0	0	1	0	0	0	1	0	1
3	R_1dHcgCCxoDJf5nR	56	0	1	4	4	0	1	3	3	6	3	2	3	9	0	1	0	0	0	0	1	0	1
3	R_3RjtEBM1n1MQUzP	45	1	6	3	2	1	1	2	3	2	2	1	3	7	0	1	0	0	0	0	1	0	1
1	R_3RjtEBM1n1MQUzP	45	1	6	3	2	1	1	2	3	2	2	1	3	5	0	0	0	0	0	0	1	1	0
4	R_3RjtEBM1n1MQUzP	45	1	6	3	2	1	1	2	3	2	2	1	3	5	0	0	0	1	0	0	1	1	0
2	R_3RjtEBM1n1MQUzP	45	1	6	3	2	1	1	2	3	2	2	1	3	10	0	0	1	0	0	0	1	0	1
6	R_3RjtEBM1n1MQUzP	45	1	6	3	2	1	1	2	3	2	2	1	3	5	0	1	0	1	0	0	1	1	0
5	R_3RjtEBM1n1MQUzP	45	1	6	3	2	1	1	2	3	2	2	1	3	10	0	0	1	1	0	0	1	0	1
4	R_2chGDvXe6AVU1pH	28	0	3	2	6	1	1	2	3	3	2	2	3	11	0	0	0	1	0	0	1	0	1
6	R_2chGDvXe6AVU1pH	28	0	3	2	6	1	1	2	3	3	2	2	3	12.5	0	1	0	1	0	0	1	0	1
2	R_2chGDvXe6AVU1pH	28	0	3	2	6	1	1	2	3	3	2	2	3	14	0	0	1	0	0	0	1	0	1
1	R_2chGDvXe6AVU1pH	28	0	3	2	6	1	1	2	3	3	2	2	3	10	0	0	0	0	0	0	1	0	1
3	R_2chGDvXe6AVU1pH	28	0	3	2	6	1	1	2	3	3	2	2	3	9	0	1	0	0	0	0	1	0	1
5	R_2chGDvXe6AVU1pH	28	0	3	2	6	1	1	2	3	3	2	2	3	11	0	0	1	1	0	0	1	0	1
1	R_2coQen3QFdbeeOI	36	1	1	2	4	0	1	2	3	3	3	2	3	8	0	0	0	0	0	0	1	0	1
2	R_2coQen3QFdbeeOI	36	1	1	2	4	0	1	2	3	3	3	2	3	15	0	0	1	0	0	0	1	0	1
6	R_2coQen3QFdbeeOI	36	1	1	2	4	0	1	2	3	3	3	2	3	9	0	1	0	1	0	0	1	0	1
3	R_2coQen3QFdbeeOI	36	1	1	2	4	0	1	2	3	3	3	2	3	10	0	1	0	0	0	0	1	0	1
4	R_2coQen3QFdbeeOI	36	1	1	2	4	0	1	2	3	3	3	2	3	9	0	0	0	1	0	0	1	0	1
5	R_2coQen3QFdbeeOI	36	1	1	2	4	0	1	2	3	3	3	2	3	10	0	0	1	1	0	0	1	0	1
6	R_3J30asbMFoqwpS0	26	1	6	1	4	0	1	3	3	4	3	2	3	23.99	0	1	0	1	0	0	1	0	1
2	R_3J30asbMFoqwpS0	26	1	6	1	4	0	1	3	3	4	3	2	3	18.98	0	0	1	0	0	0	1	0	1
4	R_3J30asbMFoqwpS0	26	1	6	1	4	0	1	3	3	4	3	2	3	17.99	0	0	0	1	0	0	1	0	1
1	R_3J30asbMFoqwpS0	26	1	6	1	4	0	1	3	3	4	3	2	3	14.5	0	0	0	0	0	0	1	0	1
3	R_3J30asbMFoqwpS0	26	1	6	1	4	0	1	3	3	4	3	2	3	22.99	0	1	0	0	0	0	1	0	1
5	R_3J30asbMFoqwpS0	26	1	6	1	4	0	1	3	3	4	3	2	3	28.99	0	0	1	1	0	0	1	0	1
